# Supplementary material for: Origin of 17O NMR chemical shifts based on molecular orbital theory: paramagnetic terms of the pre-α, α and β effects from orbital-to-orbital transitions, along with the effects from vinyl, carbonyl and carboxyl groups
Source: Royal Society of Chemistry journal article supplement (doi:10.1039/d4ra00843j), 2024-01-01
Supplement: d4ra00843j1.pdf [file d4ra00843j1.pdf]

## Supporting Information

# Origin of $^{17}\text{O}$ NMR Chemical Shifts Based on Molecular Orbital Theory: Paramagnetic Terms of the Pre- $\alpha$ , $\alpha$ and $\beta$ Effects from Orbital-to-Orbital Transitions, Along with the Effects from Vinyl, Carbonyl and Carboxyl Groups

Keigo Matsuzaki, Satoko Hayashi\* and Waro Nakanishi\*

*Faculty of Systems Engineering, Wakayama University,  
930 Sakaedani, Wakayama 640-8510, Japan.*

*E-mail: hayashi3@sys.wakayama-u.ac.jp and nakanisi@sys.wakayama-u.ac.jp.*

### Table of Contents Pages

|                                                     |         |
|-----------------------------------------------------|---------|
| Additional tables                                   | S2–S18  |
| Additional figures                                  | S19–S23 |
| References                                          | S24     |
| Computation information and geometries of compounds | S25–S39 |
| Appendix                                            | S42–S46 |

**Table S1.** The  $\sigma^d(\text{O})$ ,  $\sigma^p(\text{O})$ ,  $\sigma^t(\text{O})$  and  $-\Delta\sigma^t_{\text{Me}_2\text{O}}(\text{O})$  values (ppm) for some oxygen monomeric and dimeric species, together with observed values.<sup>a</sup>

| Species (sym <sup>b</sup> )                    | $\sigma^d(\text{O})$ | $\sigma^p(\text{O})$ | $\sigma^t(\text{O})$ | $-\Delta\sigma^t_{\text{Me}_2\text{O}}(\text{O})^c$ | $\delta(\text{O})^d$ |
|------------------------------------------------|----------------------|----------------------|----------------------|-----------------------------------------------------|----------------------|
| <b>I (monomeric ethers)</b>                    |                      |                      |                      |                                                     |                      |
| Me <sub>2</sub> O (C <sub>2v</sub> )           | 396.12               | -73.37               | 322.75               | -52.5                                               | -52.5                |
| EtOMe (C <sub>s</sub> )                        | 397.46               | -105.43              | 292.04               | -21.8                                               | -22.5                |
| <i>n</i> -PrOMe (C <sub>s</sub> )              | 400.83               | -105.99              | 294.84               | -24.6                                               | -28.5                |
| <i>i</i> -PrOMe (C <sub>1</sub> )              | 401.79               | -128.26              | 273.53               | -3.3                                                | -2.0                 |
| <i>n</i> -BuOMe (C <sub>s</sub> )              | 405.13               | -110.00              | 295.13               | -24.9                                               | -28.5                |
| <i>i</i> -BuOMe (C <sub>1</sub> )              | 399.41               | -103.96              | 295.45               | -25.2                                               | -30.0                |
| <i>s</i> -BuOMe (C <sub>1</sub> )              | 401.88               | -122.27              | 279.61               | -9.4                                                | -8.5                 |
| <i>t</i> -BuOMe (C <sub>s</sub> )              | 405.31               | -141.91              | 263.41               | 6.8                                                 | 8.5                  |
| <i>n</i> -PeOMe (C <sub>s</sub> )              | 407.52               | -112.08              | 295.44               | -25.2                                               | -27.5                |
| <i>neo</i> -PeOMe (C <sub>s</sub> )            | 399.01               | -100.22              | 298.78               | -28.5                                               | -32.5                |
| <i>s</i> -PeOMe (C <sub>1</sub> )              | 402.01               | -123.86              | 278.15               | -7.9                                                | -16.5                |
| <i>i</i> -PeOMe (C <sub>1</sub> )              | 407.07               | -110.46              | 296.61               | -26.4                                               | -29.5                |
| <i>neo</i> -HexOMe (C <sub>s</sub> )           | 408.35               | -109.40              | 298.95               | -28.7                                               | -29.5                |
| Et <sub>2</sub> O (C <sub>2v</sub> )           | 396.85               | -136.13              | 260.72               | 9.5                                                 | 6.5                  |
| <i>n</i> -PrOEt (C <sub>s</sub> )              | 398.61               | -136.04              | 262.57               | 7.7                                                 | 1.7                  |
| <i>i</i> -PrOEt (C <sub>1</sub> )              | 398.34               | -157.34              | 241.00               | 29.3                                                | 28.0                 |
| <i>n</i> -BuOEt (C <sub>s</sub> )              | 403.02               | -139.28              | 263.73               | 6.5                                                 | -1.5                 |
| <i>i</i> -BuOEt (C <sub>1</sub> )              | 396.27               | -132.29              | 263.97               | 6.3                                                 | -1.0                 |
| <i>s</i> -BuOEt (C <sub>1</sub> )              | 396.89               | -149.87              | 247.02               | 23.2                                                | 24.5                 |
| <i>t</i> -BuOEt (C <sub>1</sub> )              | 397.91               | -168.13              | 229.78               | 40.5                                                | 40.5                 |
| <i>n</i> -PeOEt (C <sub>s</sub> )              | 404.45               | -141.33              | 263.12               | 7.1                                                 | 1.5                  |
| <i>neo</i> -PeOEt (C <sub>s</sub> )            | 396.15               | -128.31              | 267.84               | 2.4                                                 | -3.5                 |
| <i>s</i> -PeOEt (C <sub>1</sub> )              | 396.73               | -150.82              | 245.91               | 24.3                                                | 15.0                 |
| <i>n</i> -Pr <sub>2</sub> O (C <sub>2v</sub> ) | 397.47               | -132.00              | 265.47               | 4.8                                                 | -3.5                 |
| <i>n</i> -PrO <i>i</i> -Pr (C <sub>1</sub> )   | 396.97               | -153.65              | 243.32               | 26.9                                                | 24.0                 |
| <i>i</i> -Pr <sub>2</sub> O (C <sub>2</sub> )  | 401.23               | -177.41              | 223.82               | 46.4                                                | 52.5                 |
| <i>i</i> -PrO <i>t</i> -Bu (C <sub>1</sub> )   | 393.43               | -184.19              | 209.25               | 61.0                                                | 62.5                 |
| <i>n</i> -Bu <sub>2</sub> O (C <sub>2v</sub> ) | 407.04               | -140.02              | 267.02               | 3.2                                                 | -7.0 <sup>e</sup>    |
| <i>s</i> -Bu <sub>2</sub> O (C <sub>2</sub> )  | 402.38               | -167.35              | 235.03               | 35.2                                                | 41.5                 |
| <i>t</i> -Bu <sub>2</sub> O (C <sub>2</sub> )  | 393.82               | -196.90              | 196.92               | 73.3                                                | 76.0                 |
| <i>i</i> -Pe <sub>2</sub> O (C <sub>2</sub> )  | 412.53               | -143.08              | 269.45               | 0.8                                                 | -7.0 <sup>e</sup>    |

<sup>a</sup>Calculated with the GIAO-DFT (B3LYP) method under B3LYP/6-311++G(3df,3pd) (B3LYP/BSS-A). <sup>b</sup>Symmetry. <sup>c</sup> $-\Delta\sigma^t_{\text{Me}_2\text{O}}(\text{O}) = -[\sigma^t(\text{O}: \text{S}) - \sigma^t(\text{O}: \text{Me}_2\text{O})] - 52.5$ . <sup>d</sup>Observed values taken from Refs. S1–S5, unless otherwise noted. Measured at 25 °C, pure liquids. <sup>e</sup>Measured at 100 °C.

(Table S1 continued)

| Species (sym <sup>b</sup> )             | $\sigma^d(\text{O})$ | $\sigma^p(\text{O})$ | $\sigma^t(\text{O})$ | $-\Delta\sigma^t_{\text{Me}_2\text{O}(\text{O})}^c$ | $\delta(\text{O})^d$ |
|-----------------------------------------|----------------------|----------------------|----------------------|-----------------------------------------------------|----------------------|
| (Me <sub>2</sub> O (C <sub>2v</sub> ))  | 396.12               | -73.37               | 322.75               | -52.5                                               | -52.5)               |
| <b>II (monomeric alcohols)</b>          |                      |                      |                      |                                                     |                      |
| MeOH (C <sub>s</sub> )                  | 395.07               | -72.87               | 322.20               | -52.0                                               | -37                  |
| EtOH (C <sub>s</sub> )                  | 398.40               | -108.33              | 290.07               | -19.8                                               | 6                    |
| <i>n</i> -PrOH (C <sub>s</sub> )        | 401.99               | -110.17              | 291.82               | -21.6                                               | 0                    |
| <i>i</i> -PrOH (C <sub>1</sub> )        | 402.81               | -152.24              | 250.57               | 19.7                                                | 38                   |
| <i>n</i> -BuOH (C <sub>s</sub> )        | 405.29               | -112.68              | 292.62               | -22.4                                               | -4                   |
| <i>i</i> -BuOH (C <sub>1</sub> )        | 401.13               | -108.32              | 292.81               | -22.6                                               | -2                   |
| <i>s</i> -BuOH (C <sub>1</sub> )        | 403.73               | -147.36              | 256.37               | 13.9                                                | 34                   |
| <i>t</i> -BuOH (C <sub>s</sub> )        | 406.99               | -180.47              | 226.52               | 43.7                                                | 70                   |
| <i>n</i> -PeOH (C <sub>s</sub> )        | 407.68               | -115.32              | 292.37               | -22.1                                               | -7                   |
| <b>III (monomeric carboxylic acids)</b> |                      |                      |                      |                                                     |                      |
| HC(=O)OH (C <sub>s</sub> )              |                      |                      | 6.58 <sup>f</sup>    | 263.7                                               | 253 <sup>g</sup>     |
| =O                                      | 404.48               | -506.77              | -102.29              | 372.5                                               |                      |
| -OH                                     | 399.82               | -284.37              | 115.44               | 154.8                                               |                      |
| MeC(=O)OH (C <sub>s</sub> )             |                      |                      | 5.85 <sup>f</sup>    | 264.4                                               | 251 <sup>g</sup>     |
| =O                                      | 401.79               | -506.86              | -105.07              | 375.3                                               |                      |
| -OH                                     | 404.53               | -287.76              | 116.77               | 153.5                                               |                      |
| EtC(=O)OH (C <sub>s</sub> )             |                      |                      | 13.74 <sup>f</sup>   | 256.5                                               | 244 <sup>g</sup>     |
| =O                                      | 405.78               | -498.53              | -92.75               | 363.0                                               |                      |
| -OH                                     | 408.25               | -288.01              | 120.24               | 150.0                                               |                      |
| <i>i</i> -PrC(=O)OH (C <sub>1</sub> )   |                      |                      | 17.75 <sup>f</sup>   | 252.5                                               | 242 <sup>g</sup>     |
| =O                                      | 404.40               | -487.71              | -83.31               | 353.6                                               |                      |
| -OH                                     | 405.68               | -286.88              | 118.80               | 151.4                                               |                      |
| <i>t</i> -BuC(=O)OH (C <sub>s</sub> )   |                      |                      | 16.47 <sup>f</sup>   | 253.8                                               | 240 <sup>g,h</sup>   |
| =O                                      | 401.51               | -491.71              | -90.20               | 360.5                                               |                      |
| -OH                                     | 401.99               | -278.85              | 123.15               | 147.1                                               |                      |

<sup>a</sup>Calculated with the GIAO-DFT (B3LYP) method under B3LYP/6-311++G(3df,3pd) (B3LYP/BSS-A). <sup>b</sup>Symmetry. <sup>c</sup> $-\Delta\sigma^t_{\text{Me}_2\text{O}(\text{O})} = -[\sigma^t(\text{O: S}) - \sigma^t(\text{O: Me}_2\text{O})] - 52.5$ . <sup>d</sup>Observed values taken from Refs. S1–S5, unless otherwise noted. Measured at 25 °C, pure liquids. <sup>e</sup>Measured at 100 °C. <sup>f</sup> $\sigma^t(\text{O})$  was given as the average value of the oxygen at the carbonyl and hydroxy groups. <sup>g</sup>Due to rapid proton exchange, only one peak appeared. <sup>h</sup>Measured at 40 °C.

(Table S1 continued)

| Species (sym <sup>b</sup> )         |          | $\sigma^d(\text{O})$ | $\sigma^p(\text{O})$ | $\sigma^t(\text{O})$ | $-\Delta\sigma^t_{\text{Me}_2\text{O}}(\text{O})^c$ | $\delta(\text{O})^d$ |
|-------------------------------------|----------|----------------------|----------------------|----------------------|-----------------------------------------------------|----------------------|
| <i>cf:</i>                          |          |                      |                      |                      |                                                     |                      |
| Me <sub>2</sub> O (C <sub>1</sub> ) |          |                      |                      | 561.36               | -51.1                                               | -52.5                |
|                                     | Unit 1   | 391.82               | -69.25               | 322.57               |                                                     |                      |
|                                     | Unit 2   | 399.57               | -79.53               | 320.04               |                                                     |                      |
| <b>IV (dimeric alcohols)</b>        |          |                      |                      |                      |                                                     |                      |
| MeOH (C <sub>1</sub> )              |          |                      |                      | 316.36               | -46.1                                               | -37                  |
|                                     | Acceptor | 401.22               | -84.86               | 316.36               |                                                     |                      |
|                                     | Donor    | 400.39               | -72.67               | 327.71               |                                                     |                      |
| EtOH (C <sub>1</sub> )              |          |                      |                      | 285.04               | -15.9                                               | 6                    |
|                                     | Acceptor | 397.63               | -112.59              | 285.04               |                                                     |                      |
|                                     | Donor    | 399.65               | -112.49              | 287.16               |                                                     |                      |
| <i>n</i> -PrOH (C <sub>1</sub> )    |          |                      |                      | 288.07               | -17.8                                               | 0                    |
|                                     | Acceptor | 394.37               | -107.80              | 286.58               |                                                     |                      |
|                                     | Donor    | 402.41               | -112.84              | 289.57               |                                                     |                      |
| <i>i</i> -PrOH (C <sub>1</sub> )    |          |                      |                      | 248.46               | 21.8                                                | 38                   |
|                                     | Acceptor | 398.94               | -153.99              | 244.95               |                                                     |                      |
|                                     | Donor    | 407.38               | -155.41              | 251.97               |                                                     |                      |
| <i>n</i> -BuOH (C <sub>1</sub> )    |          |                      |                      | 288.90               | -18.7                                               | -4                   |
|                                     | Acceptor | 396.91               | -109.81              | 287.09               |                                                     |                      |
|                                     | Donor    | 408.91               | -118.21              | 290.70               |                                                     |                      |
| <i>i</i> -BuOH (C <sub>1</sub> )    |          |                      |                      | 289.84               | -19.6                                               | -2                   |
|                                     | Acceptor | 397.14               | -109.57              | 287.57               |                                                     |                      |
|                                     | Donor    | 405.98               | -113.87              | 292.10               |                                                     |                      |
| <i>s</i> -BuOH (C <sub>1</sub> )    |          |                      |                      | 253.49               | 16.8                                                | 34                   |
|                                     | Acceptor | 397.80               | -151.06              | 246.74               |                                                     |                      |
|                                     | Donor    | 411.83               | -151.60              | 260.24               |                                                     |                      |
| <i>t</i> -BuOH (C <sub>1</sub> )    |          |                      |                      | 223.95               | 46.3                                                | 70                   |
|                                     | Acceptor | 403.57               | -184.56              | 219.01               |                                                     |                      |
|                                     | Donor    | 412.42               | -183.52              | 228.90               |                                                     |                      |
| <i>n</i> -PeOH (C <sub>1</sub> )    |          |                      |                      | 288.76               | -18.5                                               | -7                   |
|                                     | Acceptor | 394.52               | -107.32              | 287.20               |                                                     |                      |
|                                     | Donor    | 410.79               | -120.47              | 290.32               |                                                     |                      |

<sup>a</sup>Calculated with the GIAO-DFT (B3LYP) method under B3LYP/6-311++G(3df,3pd) (B3LYP/BSS-A). <sup>b</sup>Symmetry. <sup>c</sup> $-\Delta\sigma^t_{\text{Me}_2\text{O}}(\text{O}) = -[\sigma^t(\text{O}: \text{S}) - \sigma^t(\text{O}: \text{Me}_2\text{O})] - 52.5$ . <sup>d</sup>Observed values taken from Refs. S1–S5, unless otherwise noted. Measured at 25 °C, pure liquids.

(Table S1 continued)

| Species (sym <sup>b</sup> )                                | $\sigma^d(\text{O})$ | $\sigma^p(\text{O})$ | $\sigma^t(\text{O})$ | $-\Delta\sigma^t_{\text{Me}_2\text{O}}(\text{O})^c$ | $\delta(\text{O})^d$ |
|------------------------------------------------------------|----------------------|----------------------|----------------------|-----------------------------------------------------|----------------------|
| <b>V (dimeric carboxylic acids)</b>                        |                      |                      |                      |                                                     |                      |
| HC(=O)OH ( <i>C<sub>s</sub></i> )                          |                      |                      | 18.81 <sup>f</sup>   | 251.4                                               | 253 <sup>g</sup>     |
| Acceptor                                                   | 413.49               | -468.43              | -54.93               |                                                     |                      |
| Donor                                                      | 405.29               | -312.74              | 92.55                |                                                     |                      |
| MeC(=O)OH ( <i>C<sub>2h</sub></i> )                        |                      |                      | 20.76 <sup>f</sup>   | 249.5                                               | 251 <sup>g</sup>     |
| Acceptor                                                   | 414.38               | -470.91              | -56.52               |                                                     |                      |
| Donor                                                      | 417.39               | -319.35              | 98.04                |                                                     |                      |
| EtC(=O)OH ( <i>C<sub>2h</sub></i> )                        |                      |                      | 27.81 <sup>f</sup>   | 242.4                                               | 244 <sup>g</sup>     |
| Acceptor                                                   | 421.20               | -467.63              | -46.43               |                                                     |                      |
| Donor                                                      | 423.29               | -321.25              | 102.04               |                                                     |                      |
| <i>i</i> -PrC(=O)OH ( <i>C<sub>i</sub></i> ) <sup>i</sup>  |                      |                      | 32.39 <sup>f</sup>   | 237.9                                               | 242 <sup>g</sup>     |
| Acceptor                                                   | 424.31               | -459.00              | -34.70               |                                                     |                      |
| Donor                                                      | 424.42               | -324.94              | 99.48                |                                                     |                      |
| <i>t</i> -BuC(=O)OH ( <i>C<sub>2h</sub></i> ) <sup>i</sup> |                      |                      | 31.61 <sup>f</sup>   | 238.6                                               | 240 <sup>g,h</sup>   |
| Acceptor                                                   | 441.46               | -484.83              | -43.37               |                                                     |                      |
| Donor                                                      | 427.41               | -320.83              | 106.58               |                                                     |                      |

<sup>a</sup>Calculated with the GIAO-DFT (B3LYP) method under B3LYP/6-311++G(3df,3pd) (B3LYP/BSS-A). <sup>b</sup>Symmetry. <sup>c</sup> $-\Delta\sigma^t_{\text{Me}_2\text{O}}(\text{O}) = -[\sigma^t(\text{O: S}) - \sigma^t(\text{O: Me}_2\text{O})] - 52.5$ . <sup>d</sup>Observed values taken from Refs. S1–S5, unless otherwise noted. Measured at 25 °C, pure liquids. <sup>e</sup>Measured at 100 °C. <sup>f</sup> $\sigma^t(\text{O})$  was given as the average value of the oxygen at the carbonyl and hydroxy groups. <sup>g</sup>Due to rapid proton exchange, only one peak appeared. <sup>h</sup>Measured at 40 °C. <sup>i</sup>The optimization was conducted with tight convergence criteria and an ultrafine grid.

**Table S2.** The  $\sigma^d(\text{O})$ ,  $\sigma^p(\text{O})$ ,  $\sigma^t(\text{O})$  and  $\Delta\sigma^t(\text{O})$  values for some oxygen species calculated with CAM-B3LYP/BSS-A, together with the pre- $\alpha$ ,  $\alpha$ ,  $\beta$ ,  $\gamma$  and  $\delta$  effects, corresponding to the  $\Delta\sigma^t(\text{O})$  values.

| Species (sym) <sup>a</sup>                                     | $\sigma^d(\text{O})$ | $\sigma^p(\text{O})$ | $\sigma^t(\text{O})$ | $-\Delta\sigma^t(\text{O})^b$ | effect                        |
|----------------------------------------------------------------|----------------------|----------------------|----------------------|-------------------------------|-------------------------------|
| O <sup>2-</sup> ( <b>1</b> : O <sub>h</sub> )                  | 408.45               | 0.00                 | 408.45               | 0.00                          | ---                           |
| OH <sup>-</sup> ( <b>2</b> : C <sub>∞v</sub> )                 | 396.45               | -18.14               | 378.31               | 30.13                         | pre- $\alpha$                 |
| MeO <sup>-</sup> ( <b>3</b> : C <sub>3v</sub> )                | 411.68               | -106.63              | 305.04               | 103.40                        | $\alpha$                      |
| EtO <sup>-</sup> ( <b>4</b> : C <sub>s</sub> )                 | 416.27               | -224.19              | 192.08               | 216.36                        | $\beta$                       |
| <i>i</i> -PrO <sup>-</sup> ( <b>5</b> : C <sub>s</sub> )       | 419.24               | -243.99              | 175.26               | 233.19                        | $\beta$                       |
| <i>t</i> -BuO <sup>-</sup> ( <b>6</b> : C <sub>s</sub> )       | 424.00               | -210.50              | 213.51               | 194.94                        | $\beta$                       |
| H <sub>2</sub> O ( <b>7</b> : C <sub>2v</sub> )                | 392.55               | -61.89               | 330.65               | 77.79                         | pre- $\alpha$                 |
| MeOH ( <b>8</b> : C <sub>s</sub> )                             | 394.27               | -63.05               | 331.22               | 77.23                         | $\alpha$                      |
| EtOH ( <b>9</b> : C <sub>s</sub> )                             | 397.56               | -98.64               | 298.92               | 109.52                        | $\beta$                       |
| <i>i</i> -PrOH ( <b>10</b> : C <sub>1</sub> )                  | 402.33               | -142.72              | 259.61               | 148.84                        | $\beta$                       |
| <i>t</i> -BuOH ( <b>11</b> : C <sub>s</sub> )                  | 406.26               | -171.01              | 235.25               | 173.20                        | $\beta$                       |
| <i>n</i> -PrOH ( <b>12</b> : C <sub>s</sub> )                  | 400.93               | -100.30              | 300.63               | 107.82                        | $\gamma$                      |
| <i>n</i> -BuOH ( <b>13</b> : C <sub>s</sub> )                  | 404.65               | -103.23              | 301.43               | 107.02                        | $\delta$                      |
| Me <sub>2</sub> O ( <b>14</b> : C <sub>2v</sub> )              | 394.65               | -59.06               | 335.59               | 72.85                         | $\alpha$                      |
| EtOMe ( <b>15</b> : C <sub>s</sub> )                           | 396.04               | -90.97               | 305.07               | 103.37                        | $\beta$                       |
| <i>i</i> -PrOMe ( <b>16</b> : C <sub>1</sub> )                 | 400.60               | -113.64              | 286.97               | 121.48                        | $\beta$                       |
| <i>t</i> -BuOMe ( <b>17</b> : C <sub>s</sub> )                 | 404.04               | -126.34              | 277.69               | 130.76                        | $\beta$                       |
| <i>n</i> -PrOMe ( <b>18</b> : C <sub>s</sub> )                 | 399.20               | -91.68               | 307.52               | 100.93                        | $\gamma$                      |
| <i>n</i> -BuOMe ( <b>19</b> : C <sub>s</sub> )                 | 403.67               | -95.65               | 308.01               | 100.43                        | $\delta$                      |
| Et <sub>2</sub> O ( <b>20</b> : C <sub>2v</sub> )              | 395.35               | -121.80              | 273.55               | 134.90                        | $\beta$                       |
| <i>i</i> -Pr <sub>2</sub> O ( <b>21</b> : C <sub>2</sub> )     | 400.01               | -161.78              | 238.23               | 170.22                        | $\beta$                       |
| <i>t</i> -Bu <sub>2</sub> O ( <b>22</b> : C <sub>2</sub> )     | 389.44               | -176.28              | 213.16               | 195.29                        | $\beta$                       |
| <i>n</i> -Pr <sub>2</sub> O ( <b>23</b> : C <sub>2v</sub> )    | 395.52               | -117.52              | 278.00               | 130.45                        | $\gamma$                      |
| <i>n</i> -Bu <sub>2</sub> O ( <b>24</b> : C <sub>2v</sub> )    | 404.46               | -124.90              | 279.56               | 128.89                        | $\delta$                      |
| H <sub>3</sub> O <sup>+</sup> ( <b>25</b> : C <sub>3v</sub> )  | 396.83               | -88.61               | 308.22               | 100.22                        | pre- $\alpha$                 |
| MeH <sub>2</sub> O <sup>+</sup> ( <b>26</b> : C <sub>s</sub> ) | 399.72               | -86.66               | 313.06               | 95.39                         | $\alpha$                      |
| EtH <sub>2</sub> O <sup>+</sup> ( <b>27</b> : C <sub>1</sub> ) | 407.22               | -124.08              | 283.14               | 125.31                        | $\beta$                       |
| Me <sub>3</sub> O <sup>+</sup> ( <b>28</b> : C <sub>3v</sub> ) | 402.36               | -88.53               | 313.83               | 94.62                         | $\alpha$                      |
| Et <sub>3</sub> O <sup>+</sup> ( <b>29</b> : C <sub>3</sub> )  | 396.58               | -138.59              | 257.99               | 150.46                        | $\beta$                       |
| OH <sup>+</sup> ( <b>30</b> : C <sub>∞v</sub> )                | 386.76               | 630.34               | 1017.10              | -608.65                       | pre- $\alpha$                 |
| H <sub>2</sub> C=CHOH ( <b>31</b> : C <sub>s</sub> )           | 402.08               | -181.24              | 220.84               | 187.61                        | C=C                           |
| H <sub>2</sub> C=CHOMe ( <b>32</b> : C <sub>s</sub> )          | 401.13               | -156.58              | 244.55               | 163.90                        | C=C                           |
| PhOH ( <b>33</b> : C <sub>s</sub> )                            | 392.00               | -172.35              | 219.65               | 188.80                        | C <sub>6</sub> H <sub>5</sub> |
| H <sub>2</sub> C=O ( <b>34</b> : C <sub>2v</sub> )             | 403.91               | -837.06              | -433.14              | 841.59                        | C=O                           |
| HC(=O*)OH ( <b>35</b> : C <sub>s</sub> )                       | 404.14               | -500.88              | -96.74               | 505.19                        | OC=O                          |
| HC(=O)O*H ( <b>36</b> : C <sub>s</sub> )                       | 399.28               | -273.62              | 125.66               | 282.79                        | OC=O                          |

<sup>a</sup>Symmetry. <sup>b</sup> $-\Delta\sigma^t(\text{O}) = -[\sigma^t(\text{O}: \text{S}) - \sigma^t(\text{O}: \text{O}^{2-})]$ .

**Table S3.** The  $\sigma^d(\text{O})$ ,  $\sigma^p(\text{O})$ ,  $\sigma^t(\text{O})$  and  $\Delta\sigma^t(\text{O})$  values for some oxygen species calculated with PBE/BSS-A, together with the pre- $\alpha$ ,  $\alpha$ ,  $\beta$ ,  $\gamma$  and  $\delta$  effects, corresponding to the  $\Delta\sigma^t(\text{O})$  values.

| Species (sym) <sup>a</sup>                                     | $\sigma^d(\text{O})$ | $\sigma^p(\text{O})$ | $\sigma^t(\text{O})$ | $-\Delta\sigma^t(\text{O})^b$ | effect                        |
|----------------------------------------------------------------|----------------------|----------------------|----------------------|-------------------------------|-------------------------------|
| O <sup>2-</sup> ( <b>1</b> : O <sub>h</sub> )                  | 407.92               | 0.00                 | 407.92               | 0.00                          | ---                           |
| OH <sup>-</sup> ( <b>2</b> : C <sub>∞v</sub> )                 | 395.70               | -12.85               | 382.85               | 25.07                         | pre- $\alpha$                 |
| MeO <sup>-</sup> ( <b>3</b> : C <sub>3v</sub> )                | 419.25               | -162.45              | 256.80               | 151.12                        | $\alpha$                      |
| EtO <sup>-</sup> ( <b>4</b> : C <sub>s</sub> )                 | 422.66               | -377.84              | 44.82                | 363.11                        | $\beta$                       |
| <i>i</i> -PrO <sup>-</sup> ( <b>5</b> : C <sub>s</sub> )       | 427.93               | -357.88              | 70.04                | 337.88                        | $\beta$                       |
| <i>t</i> -BuO <sup>-</sup> ( <b>6</b> : C <sub>s</sub> )       | 431.69               | -233.01              | 198.67               | 209.25                        | $\beta$                       |
| H <sub>2</sub> O ( <b>7</b> : C <sub>2v</sub> )                | 392.11               | -68.49               | 323.62               | 84.30                         | pre- $\alpha$                 |
| MeOH ( <b>8</b> : C <sub>s</sub> )                             | 395.04               | -79.55               | 315.48               | 92.44                         | $\alpha$                      |
| EtOH ( <b>9</b> : C <sub>s</sub> )                             | 398.36               | -116.65              | 281.71               | 126.22                        | $\beta$                       |
| <i>i</i> -PrOH ( <b>10</b> : C <sub>1</sub> )                  | 402.71               | -163.60              | 239.11               | 168.81                        | $\beta$                       |
| <i>t</i> -BuOH ( <b>11</b> : C <sub>s</sub> )                  | 407.90               | -192.64              | 215.26               | 192.66                        | $\beta$                       |
| <i>n</i> -PrOH ( <b>12</b> : C <sub>s</sub> )                  | 402.03               | -118.47              | 283.56               | 124.36                        | $\gamma$                      |
| <i>n</i> -BuOH ( <b>13</b> : C <sub>s</sub> )                  | 404.85               | -120.41              | 284.44               | 123.49                        | $\delta$                      |
| Me <sub>2</sub> O ( <b>14</b> : C <sub>2v</sub> )              | 396.70               | -84.50               | 312.21               | 95.72                         | $\alpha$                      |
| EtOMe ( <b>15</b> : C <sub>s</sub> )                           | 398.01               | -117.75              | 280.26               | 127.66                        | $\beta$                       |
| <i>i</i> -PrOMe ( <b>16</b> : C <sub>1</sub> )                 | 403.30               | -142.81              | 260.49               | 147.43                        | $\beta$                       |
| <i>t</i> -BuOMe ( <b>17</b> : C <sub>s</sub> )                 | 408.28               | -157.83              | 250.44               | 157.48                        | $\beta$                       |
| <i>n</i> -PrOMe ( <b>18</b> : C <sub>s</sub> )                 | 401.33               | -118.00              | 283.32               | 124.60                        | $\gamma$                      |
| <i>n</i> -BuOMe ( <b>19</b> : C <sub>s</sub> )                 | 405.22               | -121.67              | 283.55               | 124.38                        | $\delta$                      |
| Et <sub>2</sub> O ( <b>20</b> : C <sub>2v</sub> )              | 397.46               | -149.80              | 247.66               | 160.27                        | $\beta$                       |
| <i>i</i> -Pr <sub>2</sub> O ( <b>21</b> : C <sub>2</sub> )     | 407.01               | -199.02              | 207.99               | 199.93                        | $\beta$                       |
| <i>t</i> -Bu <sub>2</sub> O ( <b>22</b> : C <sub>2</sub> )     | 404.24               | -222.79              | 181.45               | 226.48                        | $\beta$                       |
| <i>n</i> -Pr <sub>2</sub> O ( <b>23</b> : C <sub>2v</sub> )    | 397.69               | -144.82              | 252.87               | 155.06                        | $\gamma$                      |
| <i>n</i> -Bu <sub>2</sub> O ( <b>24</b> : C <sub>2v</sub> )    | 406.41               | -151.82              | 254.58               | 153.34                        | $\delta$                      |
| H <sub>3</sub> O <sup>+</sup> ( <b>25</b> : C <sub>3v</sub> )  | 396.14               | -95.55               | 300.59               | 107.33                        | pre- $\alpha$                 |
| MeH <sub>2</sub> O <sup>+</sup> ( <b>26</b> : C <sub>s</sub> ) | 399.60               | -102.06              | 297.54               | 110.39                        | $\alpha$                      |
| EtH <sub>2</sub> O <sup>+</sup> ( <b>27</b> : C <sub>1</sub> ) | 407.94               | -142.86              | 265.08               | 142.84                        | $\beta$                       |
| Me <sub>3</sub> O <sup>+</sup> ( <b>28</b> : C <sub>3v</sub> ) | 401.72               | -122.33              | 279.38               | 128.54                        | $\alpha$                      |
| Et <sub>3</sub> O <sup>+</sup> ( <b>29</b> : C <sub>3</sub> )  | 398.67               | -183.22              | 215.45               | 192.47                        | $\beta$                       |
| OH <sup>+</sup> ( <b>30</b> : C <sub>∞v</sub> )                | —                    | —                    | —                    | —                             | pre- $\alpha$                 |
| H <sub>2</sub> C=CHOH ( <b>31</b> : C <sub>s</sub> )           | 402.99               | -208.66              | 194.32               | 213.60                        | C=C                           |
| H <sub>2</sub> C=CHOMe ( <b>32</b> : C <sub>s</sub> )          | 403.42               | -191.62              | 211.80               | 196.12                        | C=C                           |
| PhOH ( <b>33</b> : C <sub>s</sub> )                            | 379.94               | -187.07              | 192.87               | 215.05                        | C <sub>6</sub> H <sub>5</sub> |
| H <sub>2</sub> C=O ( <b>34</b> : C <sub>2v</sub> )             | 404.32               | -837.03              | -432.71              | 840.64                        | C=O                           |
| HC(=O*)OH ( <b>35</b> : C <sub>s</sub> )                       | 404.18               | -508.34              | -104.16              | 512.08                        | OC=O                          |
| HC(=O)O*H ( <b>36</b> : C <sub>s</sub> )                       | 399.90               | -301.91              | 97.99                | 309.94                        | OC=O                          |

<sup>a</sup>Symmetry. <sup>b</sup> $-\Delta\sigma^t(\text{O}) = -[\sigma^t(\text{O}: \text{S}) - \sigma^t(\text{O}: \text{O}^{2-})]$ .

**Table S4.** The  $\sigma^d(\text{O})$ ,  $\sigma^p(\text{O})$ ,  $\sigma^t(\text{O})$  and  $\Delta\sigma^t(\text{O})$  values for some oxygen species calculated with PBE0/BSS-A, together with the pre- $\alpha$ ,  $\alpha$ ,  $\beta$ ,  $\gamma$  and  $\delta$  effects, corresponding to the  $\Delta\sigma^t(\text{O})$  values.

| Species (sym) <sup>a</sup>                                     | $\sigma^d(\text{O})$ | $\sigma^p(\text{O})$ | $\sigma^t(\text{O})$ | $-\Delta\sigma^t(\text{O})^b$ | effect                        |
|----------------------------------------------------------------|----------------------|----------------------|----------------------|-------------------------------|-------------------------------|
| O <sup>2-</sup> ( <b>1</b> : O <sub>h</sub> )                  | 408.08               | 0.00                 | 408.08               | 0.00                          | -                             |
| OH <sup>-</sup> ( <b>2</b> : C <sub>∞v</sub> )                 | 396.19               | -18.15               | 378.04               | 30.04                         | pre- $\alpha$                 |
| MeO <sup>-</sup> ( <b>3</b> : C <sub>3v</sub> )                | 413.45               | -113.93              | 299.52               | 108.56                        | $\alpha$                      |
| EtO <sup>-</sup> ( <b>4</b> : C <sub>s</sub> )                 | 418.30               | -257.84              | 160.46               | 247.62                        | $\beta$                       |
| <i>i</i> -PrO <sup>-</sup> ( <b>5</b> : C <sub>s</sub> )       | 422.68               | -271.53              | 151.15               | 256.93                        | $\beta$                       |
| <i>t</i> -BuO <sup>-</sup> ( <b>6</b> : C <sub>s</sub> )       | 427.41               | -214.47              | 212.94               | 195.14                        | $\beta$                       |
| H <sub>2</sub> O ( <b>7</b> : C <sub>2v</sub> )                | 392.53               | -62.21               | 330.32               | 77.76                         | pre- $\alpha$                 |
| MeOH ( <b>8</b> : C <sub>s</sub> )                             | 394.94               | -64.28               | 330.66               | 77.42                         | $\alpha$                      |
| EtOH ( <b>9</b> : C <sub>s</sub> )                             | 398.33               | -99.45               | 298.88               | 109.19                        | $\beta$                       |
| <i>i</i> -PrOH ( <b>10</b> : C <sub>1</sub> )                  | 403.69               | -144.15              | 259.54               | 148.54                        | $\beta$                       |
| <i>t</i> -BuOH ( <b>11</b> : C <sub>s</sub> )                  | 408.98               | -173.05              | 235.93               | 172.15                        | $\beta$                       |
| <i>n</i> -PrOH ( <b>12</b> : C <sub>s</sub> )                  | 402.23               | -101.97              | 300.27               | 107.81                        | $\gamma$                      |
| <i>n</i> -BuOH ( <b>13</b> : C <sub>s</sub> )                  | 405.74               | -104.60              | 301.13               | 106.95                        | $\delta$                      |
| Me <sub>2</sub> O ( <b>14</b> : C <sub>2v</sub> )              | 395.95               | -62.20               | 333.75               | 74.33                         | $\alpha$                      |
| EtOMe ( <b>15</b> : C <sub>s</sub> )                           | 397.41               | -93.69               | 303.72               | 104.36                        | $\beta$                       |
| <i>i</i> -PrOMe ( <b>16</b> : C <sub>1</sub> )                 | 402.88               | -117.04              | 285.84               | 122.24                        | $\beta$                       |
| <i>t</i> -BuOMe ( <b>17</b> : C <sub>s</sub> )                 | 407.30               | -130.64              | 276.67               | 131.41                        | $\beta$                       |
| <i>n</i> -PrOMe ( <b>18</b> : C <sub>s</sub> )                 | 400.69               | -94.63               | 306.06               | 102.02                        | $\gamma$                      |
| <i>n</i> -BuOMe ( <b>19</b> : C <sub>s</sub> )                 | 405.00               | -98.57               | 306.42               | 101.66                        | $\delta$                      |
| Et <sub>2</sub> O ( <b>20</b> : C <sub>2v</sub> )              | 396.96               | -123.92              | 273.04               | 135.04                        | $\beta$                       |
| <i>i</i> -Pr <sub>2</sub> O ( <b>21</b> : C <sub>2</sub> )     | 406.04               | -167.62              | 238.41               | 169.67                        | $\beta$                       |
| <i>t</i> -Bu <sub>2</sub> O ( <b>22</b> : C <sub>2</sub> )     | 397.32               | -184.59              | 212.73               | 195.35                        | $\beta$                       |
| <i>n</i> -Pr <sub>2</sub> O ( <b>23</b> : C <sub>2v</sub> )    | 396.84               | -119.87              | 276.97               | 131.11                        | $\gamma$                      |
| <i>n</i> -Bu <sub>2</sub> O ( <b>24</b> : C <sub>2v</sub> )    | 406.09               | -127.44              | 278.66               | 129.42                        | $\delta$                      |
| H <sub>3</sub> O <sup>+</sup> ( <b>25</b> : C <sub>3v</sub> )  | 396.89               | -88.78               | 308.11               | 99.97                         | pre- $\alpha$                 |
| MeH <sub>2</sub> O <sup>+</sup> ( <b>26</b> : C <sub>s</sub> ) | 400.29               | -88.78               | 311.51               | 96.57                         | $\alpha$                      |
| EtH <sub>2</sub> O <sup>+</sup> ( <b>27</b> : C <sub>1</sub> ) | 408.30               | -126.24              | 282.05               | 126.03                        | $\beta$                       |
| Me <sub>3</sub> O <sup>+</sup> ( <b>28</b> : C <sub>3v</sub> ) | 403.65               | -95.20               | 308.45               | 99.63                         | $\alpha$                      |
| Et <sub>3</sub> O <sup>+</sup> ( <b>29</b> : C <sub>3</sub> )  | 398.56               | -145.04              | 253.52               | 154.55                        | $\beta$                       |
| OH <sup>+</sup> ( <b>30</b> : C <sub>∞v</sub> )                | 386.17               | 633.26               | 1019.42              | -611.34                       | pre- $\alpha$                 |
| H <sub>2</sub> C=CHOH ( <b>31</b> : C <sub>s</sub> )           | 403.43               | -187.68              | 215.75               | 192.33                        | C=C                           |
| H <sub>2</sub> C=CHOMe ( <b>32</b> : C <sub>s</sub> )          | 402.83               | -164.34              | 238.49               | 169.58                        | C=C                           |
| PhOH ( <b>33</b> : C <sub>s</sub> )                            | 392.29               | -178.60              | 213.69               | 194.39                        | C <sub>6</sub> H <sub>5</sub> |
| H <sub>2</sub> C=O ( <b>34</b> : C <sub>2v</sub> )             | 404.19               | -826.92              | -422.73              | 830.81                        | C=O                           |
| HC(=O*)OH ( <b>35</b> : C <sub>s</sub> )                       | 404.40               | -498.09              | -93.69               | 501.77                        | OC=O                          |
| HC(=O)O*H ( <b>36</b> : C <sub>s</sub> )                       | 399.88               | -276.34              | 123.54               | 284.54                        | OC=O                          |

<sup>a</sup>Symmetry. <sup>b</sup> $-\Delta\sigma^t(\text{O}) = -[\sigma^t(\text{O}: \text{S}) - \sigma^t(\text{O}: \text{O}^{2-})]$ .



**Table S5.** The  $\sigma^d(\text{O})$ ,  $\sigma^p(\text{O})$ ,  $\sigma^t(\text{O})$  and  $\Delta\sigma^t(\text{O})$  values for some oxygen species calculated with LC- $\omega$ PBE/BSS-A, together with the pre- $\alpha$ ,  $\alpha$ ,  $\beta$ ,  $\gamma$  and  $\delta$  effects, corresponding to the  $\Delta\sigma^t(\text{O})$  values.

| Species (sym) <sup>a</sup>                                     | $\sigma^d(\text{O})$ | $\sigma^p(\text{O})$ | $\sigma^t(\text{O})$ | $-\Delta\sigma^t(\text{O})^b$ | effect                        |
|----------------------------------------------------------------|----------------------|----------------------|----------------------|-------------------------------|-------------------------------|
| O <sup>2-</sup> ( <b>1</b> : O <sub>h</sub> )                  | 408.33               | 0.00                 | 408.33               | 0.00                          | -                             |
| OH <sup>-</sup> ( <b>2</b> : C <sub>∞v</sub> )                 | 395.94               | -17.14               | 378.80               | 29.53                         | pre- $\alpha$                 |
| MeO <sup>-</sup> ( <b>3</b> : C <sub>3v</sub> )                | 408.50               | -75.88               | 332.62               | 75.71                         | $\alpha$                      |
| EtO <sup>-</sup> ( <b>4</b> : C <sub>s</sub> )                 | 413.29               | -164.30              | 248.99               | 159.34                        | $\beta$                       |
| <i>i</i> -PrO <sup>-</sup> ( <b>5</b> : C <sub>s</sub> )       | 416.67               | -193.72              | 222.95               | 185.38                        | $\beta$                       |
| <i>t</i> -BuO <sup>-</sup> ( <b>6</b> : C <sub>s</sub> )       | 422.58               | -188.98              | 233.60               | 174.73                        | $\beta$                       |
| H <sub>2</sub> O ( <b>7</b> : C <sub>2v</sub> )                | 392.54               | -58.17               | 334.37               | 73.95                         | pre- $\alpha$                 |
| MeOH ( <b>8</b> : C <sub>s</sub> )                             | 393.98               | -53.74               | 340.24               | 68.09                         | $\alpha$                      |
| EtOH ( <b>9</b> : C <sub>s</sub> )                             | 397.34               | -86.90               | 310.43               | 97.89                         | $\beta$                       |
| <i>i</i> -PrOH ( <b>10</b> : C <sub>1</sub> )                  | 403.14               | -129.80              | 273.34               | 134.99                        | $\beta$                       |
| <i>t</i> -BuOH ( <b>11</b> : C <sub>s</sub> )                  | 408.09               | -159.48              | 248.61               | 159.72                        | $\beta$                       |
| <i>n</i> -PrOH ( <b>12</b> : C <sub>s</sub> )                  | 400.74               | -89.42               | 311.32               | 97.01                         | $\gamma$                      |
| <i>n</i> -BuOH ( <b>13</b> : C <sub>s</sub> )                  | 404.41               | -92.36               | 312.05               | 96.28                         | $\delta$                      |
| Me <sub>2</sub> O ( <b>14</b> : C <sub>2v</sub> )              | 393.42               | -46.13               | 347.28               | 61.04                         | $\alpha$                      |
| EtOMe ( <b>15</b> : C <sub>s</sub> )                           | 394.92               | -75.29               | 319.62               | 88.70                         | $\beta$                       |
| <i>i</i> -PrOMe ( <b>16</b> : C <sub>1</sub> )                 | 400.87               | -98.54               | 302.33               | 106.00                        | $\beta$                       |
| <i>t</i> -BuOMe ( <b>17</b> : C <sub>s</sub> )                 | 405.22               | -113.20              | 292.02               | 116.31                        | $\beta$                       |
| <i>n</i> -PrOMe ( <b>18</b> : C <sub>s</sub> )                 | 397.83               | -76.86               | 320.97               | 87.36                         | $\gamma$                      |
| <i>n</i> -BuOMe ( <b>19</b> : C <sub>s</sub> )                 | 401.99               | -80.47               | 321.52               | 86.81                         | $\delta$                      |
| Et <sub>2</sub> O ( <b>20</b> : C <sub>2v</sub> )              | 394.53               | -103.69              | 290.84               | 117.49                        | $\beta$                       |
| <i>i</i> -Pr <sub>2</sub> O ( <b>21</b> : C <sub>2</sub> )     | 404.45               | -145.89              | 258.56               | 149.76                        | $\beta$                       |
| <i>t</i> -Bu <sub>2</sub> O ( <b>22</b> : C <sub>2</sub> )     | 393.56               | -161.77              | 231.79               | 176.54                        | $\beta$                       |
| <i>n</i> -Pr <sub>2</sub> O ( <b>23</b> : C <sub>2v</sub> )    | 394.14               | -100.75              | 293.38               | 114.94                        | $\gamma$                      |
| <i>n</i> -Bu <sub>2</sub> O ( <b>24</b> : C <sub>2v</sub> )    | 402.03               | -107.24              | 294.79               | 113.54                        | $\delta$                      |
| H <sub>3</sub> O <sup>+</sup> ( <b>25</b> : C <sub>3v</sub> )  | 396.74               | -85.72               | 311.02               | 97.30                         | pre- $\alpha$                 |
| MeH <sub>2</sub> O <sup>+</sup> ( <b>26</b> : C <sub>s</sub> ) | 399.72               | -81.11               | 318.61               | 89.71                         | $\alpha$                      |
| EtH <sub>2</sub> O <sup>+</sup> ( <b>27</b> : C <sub>1</sub> ) | 407.12               | -116.42              | 290.70               | 117.63                        | $\beta$                       |
| Me <sub>3</sub> O <sup>+</sup> ( <b>28</b> : C <sub>3v</sub> ) | 401.02               | -75.76               | 325.26               | 83.06                         | $\alpha$                      |
| Et <sub>3</sub> O <sup>+</sup> ( <b>29</b> : C <sub>3</sub> )  | 398.89               | -123.10              | 275.79               | 132.53                        | $\beta$                       |
| OH <sup>+</sup> ( <b>30</b> : C <sub>∞v</sub> )                | 386.10               | 633.26               | 1019.36              | -611.03                       | pre- $\alpha$                 |
| H <sub>2</sub> C=CHOH ( <b>31</b> : C <sub>s</sub> )           | 402.72               | -170.64              | 232.08               | 176.25                        | C=C                           |
| H <sub>2</sub> C=CHOMe ( <b>32</b> : C <sub>s</sub> )          | 400.96               | -143.65              | 257.32               | 151.01                        | C=C                           |
| PhOH ( <b>33</b> : C <sub>s</sub> )                            | 393.47               | -165.13              | 228.35               | 179.98                        | C <sub>6</sub> H <sub>5</sub> |
| H <sub>2</sub> C=O ( <b>34</b> : C <sub>2v</sub> )             | 403.57               | -824.81              | -421.23              | 829.56                        | C=O                           |
| HC(=O*)OH ( <b>35</b> : C <sub>s</sub> )                       | 404.25               | -492.72              | -88.47               | 496.80                        | OC=O                          |
| HC(=O)O*H ( <b>36</b> : C <sub>s</sub> )                       | 399.49               | -264.81              | 134.67               | 273.65                        | OC=O                          |

<sup>a</sup>Symmetry. <sup>b</sup> $-\Delta\sigma^t(\text{O}) = -[\sigma^t(\text{O: S}) - \sigma^t(\text{O: O}^{2-})]$ .

**Table S6.** The  $\sigma^d(\text{O})$ ,  $\sigma^p(\text{O})$ ,  $\sigma^t(\text{O})$  and  $\Delta\sigma^t(\text{O})$  values for some oxygen species calculated with  $\omega\text{B97X-D/BSS-A}$ , together with the pre- $\alpha$ ,  $\alpha$ ,  $\beta$ ,  $\gamma$  and  $\delta$  effects, corresponding to the  $\Delta\sigma^t(\text{O})$  values.

| Species (sym) <sup>a</sup>                                     | $\sigma^d(\text{O})$ | $\sigma^p(\text{O})$ | $\sigma^t(\text{O})$ | $-\Delta\sigma^t(\text{O})^b$ | effect                 |
|----------------------------------------------------------------|----------------------|----------------------|----------------------|-------------------------------|------------------------|
| $\text{O}^{2-}$ ( <b>1</b> : $O_h$ )                           | 408.28               | 0.00                 | 408.28               | 0.00                          | -                      |
| $\text{OH}^-$ ( <b>2</b> : $C_{\infty v}$ )                    | 393.83               | -16.13               | 377.70               | 30.58                         | pre- $\alpha$          |
| $\text{MeO}^-$ ( <b>3</b> : $C_{3v}$ )                         | 408.87               | -98.89               | 309.98               | 98.29                         | $\alpha$               |
| $\text{EtO}^-$ ( <b>4</b> : $C_s$ )                            | 412.97               | -205.30              | 207.67               | 200.61                        | $\beta$                |
| <i>i</i> - $\text{PrO}^-$ ( <b>5</b> : $C_s$ )                 | 415.56               | -228.54              | 187.02               | 221.25                        | $\beta$                |
| <i>t</i> - $\text{BuO}^-$ ( <b>6</b> : $C_s$ )                 | 420.29               | -203.86              | 216.43               | 191.84                        | $\beta$                |
| $\text{H}_2\text{O}$ ( <b>7</b> : $C_{2v}$ )                   | 392.54               | -61.18               | 331.37               | 76.91                         | pre- $\alpha$          |
| $\text{MeOH}$ ( <b>8</b> : $C_s$ )                             | 392.52               | -59.57               | 332.95               | 75.32                         | $\alpha$               |
| $\text{EtOH}$ ( <b>9</b> : $C_s$ )                             | 395.10               | -92.55               | 302.54               | 105.73                        | $\beta$                |
| <i>i</i> - $\text{PrOH}$ ( <b>10</b> : $C_1$ )                 | 399.40               | -135.01              | 264.39               | 143.88                        | $\beta$                |
| <i>t</i> - $\text{BuOH}$ ( <b>11</b> : $C_s$ )                 | 402.04               | -162.09              | 239.96               | 168.32                        | $\beta$                |
| <i>n</i> - $\text{PrOH}$ ( <b>12</b> : $C_s$ )                 | 398.62               | -94.97               | 303.65               | 104.62                        | $\gamma$               |
| <i>n</i> - $\text{BuOH}$ ( <b>13</b> : $C_s$ )                 | 401.25               | -96.89               | 304.37               | 103.91                        | $\delta$               |
| $\text{Me}_2\text{O}$ ( <b>14</b> : $C_{2v}$ )                 | 390.93               | -54.36               | 336.58               | 71.70                         | $\alpha$               |
| $\text{EtOMe}$ ( <b>15</b> : $C_s$ )                           | 391.86               | -83.91               | 307.94               | 100.33                        | $\beta$                |
| <i>i</i> - $\text{PrOMe}$ ( <b>16</b> : $C_1$ )                | 396.00               | -106.24              | 289.76               | 118.52                        | $\beta$                |
| <i>t</i> - $\text{BuOMe}$ ( <b>17</b> : $C_1$ )                | 399.03               | -118.47              | 280.55               | 127.72                        | $\beta$                |
| <i>n</i> - $\text{PrOMe}$ ( <b>18</b> : $C_s$ )                | 394.94               | -85.21               | 309.73               | 98.54                         | $\gamma$               |
| <i>n</i> - $\text{BuOMe}$ ( <b>19</b> : $C_s$ )                | 398.34               | -88.04               | 310.31               | 97.97                         | $\delta$               |
| $\text{Et}_2\text{O}$ ( <b>20</b> : $C_{2v}$ )                 | 391.27               | -112.90              | 278.37               | 129.91                        | $\beta$                |
| <i>i</i> - $\text{Pr}_2\text{O}$ ( <b>21</b> : $C_2$ )         | 393.89               | -149.80              | 244.10               | 164.18                        | $\beta$                |
| <i>t</i> - $\text{Bu}_2\text{O}$ ( <b>22</b> : $C_2$ )         | 381.15               | -166.47              | 214.68               | 193.60                        | $\beta$                |
| <i>n</i> - $\text{Pr}_2\text{O}$ ( <b>23</b> : $C_2$ )         | 392.16               | -110.33              | 281.83               | 126.45                        | $\gamma$               |
| <i>n</i> - $\text{Bu}_2\text{O}$ ( <b>24</b> : $C_2$ )         | 400.23               | -116.90              | 283.33               | 124.95                        | $\delta$               |
| $\text{H}_3\text{O}^+$ ( <b>25</b> : $C_{3v}$ )                | 404.04               | -95.91               | 308.14               | 100.14                        | pre- $\alpha$          |
| $\text{MeH}_2\text{O}^+$ ( <b>26</b> : $C_s$ )                 | 402.89               | -89.40               | 313.50               | 94.78                         | $\alpha$               |
| $\text{EtH}_2\text{O}^+$ ( <b>27</b> : $C_1$ )                 | 409.40               | -124.15              | 285.26               | 123.02                        | $\beta$                |
| $\text{Me}_3\text{O}^+$ ( <b>28</b> : $C_{3v}$ )               | 396.57               | -84.38               | 312.19               | 96.08                         | $\alpha$               |
| $\text{Et}_3\text{O}^+$ ( <b>29</b> : $C_3$ )                  | 391.52               | -130.29              | 261.23               | 147.05                        | $\beta$                |
| $\text{OH}^+$ ( <b>30</b> : $C_{\infty v}$ )                   | 388.03               | 1407.40              | 1795.43              | -1387.15                      | pre- $\alpha$          |
| $\text{H}_2\text{C}=\text{CHOH}$ ( <b>31</b> : $C_s$ )         | 401.63               | -179.05              | 222.58               | 185.69                        | $\text{C}=\text{C}$    |
| $\text{H}_2\text{C}=\text{CHOMe}$ ( <b>32</b> : $C_s$ )        | 398.71               | -135.81              | 262.90               | 145.38                        | $\text{C}=\text{C}$    |
| $\text{PhOH}$ ( <b>33</b> : $C_s$ )                            | 393.62               | -173.13              | 220.49               | 187.79                        | $\text{C}_6\text{H}_5$ |
| $\text{H}_2\text{C}=\text{O}$ ( <b>34</b> : $C_{2v}$ )         | 404.53               | -824.59              | -420.07              | 828.34                        | $\text{C}=\text{O}$    |
| $\text{HC}(=\text{O}^*)\text{OH}$ ( <b>35</b> : $C_s$ )        | 404.60               | -497.59              | -92.99               | 501.26                        | $\text{OC}=\text{O}$   |
| $\text{HC}(=\text{O})\text{O}^*\text{H}$ ( <b>36</b> : $C_s$ ) | 399.22               | -271.31              | 127.91               | 280.37                        | $\text{OC}=\text{O}$   |

<sup>a</sup>Symmetry. <sup>b</sup> $-\Delta\sigma^t(\text{O}) = -[\sigma^t(\text{O}: \text{S}) - \sigma^t(\text{O}: \text{O}^{2-})]$ .

**Table S7.** The  $\sigma^t(\text{O})$  and  $-\Delta\sigma^t_{\text{Me}_2\text{O}}(\text{O})$  values for some ether species calculated with MP2/BSS-A, together with observed values.<sup>a</sup>

| Species (sym <sup>b</sup> )                            | $\sigma^t(\text{O})$ | $-\Delta\sigma^t_{\text{Me}_2\text{O}}(\text{O})^c$ | $\delta(\text{O})^d$ |
|--------------------------------------------------------|----------------------|-----------------------------------------------------|----------------------|
| <b>I (monomeric ethers)</b>                            |                      |                                                     |                      |
| Me <sub>2</sub> O ( <i>C</i> <sub>2v</sub> )           | 354.80               | -52.5                                               | -52.5                |
| EtOMe ( <i>C</i> <sub>s</sub> )                        | 324.65               | -22.4                                               | -22.5                |
| <i>n</i> -PrOMe ( <i>C</i> <sub>s</sub> )              | 329.27               | -27.0                                               | -28.5                |
| <i>i</i> -PrOMe ( <i>C</i> <sub>1</sub> )              | 313.05               | -10.8                                               | -2.0                 |
| <i>n</i> -BuOMe ( <i>C</i> <sub>s</sub> )              | 327.70               | -25.4                                               | -28.5                |
| <i>i</i> -BuOMe ( <i>C</i> <sub>1</sub> )              | 326.68               | -24.4                                               | -30.0                |
| <i>s</i> -BuOMe ( <i>C</i> <sub>1</sub> )              | 328.73               | -26.4                                               | -8.5                 |
| <i>t</i> -BuOMe ( <i>C</i> <sub>s</sub> )              | 293.48               | 8.8                                                 | 8.5                  |
| <i>n</i> -PeOMe ( <i>C</i> <sub>s</sub> )              | 327.65               | -25.4                                               | -27.5                |
| <i>neo</i> -PeOMe ( <i>C</i> <sub>s</sub> )            | 330.24               | -27.9                                               | -32.5                |
| <i>s</i> -PeOMe ( <i>C</i> <sub>1</sub> )              | 303.23               | -0.9                                                | -16.5                |
| <i>i</i> -PeOMe ( <i>C</i> <sub>1</sub> )              | 332.79               | -30.5                                               | -29.5                |
| <i>neo</i> -HexOMe ( <i>C</i> <sub>s</sub> )           | 328.54               | -26.2                                               | -29.5                |
| Et <sub>2</sub> O ( <i>C</i> <sub>2v</sub> )           | 291.82               | 10.5                                                | 6.5                  |
| <i>n</i> -PrOEt ( <i>C</i> <sub>s</sub> )              | 297.26               | 5.0                                                 | 1.7                  |
| <i>i</i> -PrOEt ( <i>C</i> <sub>1</sub> )              | 279.19               | 23.1                                                | 28.0                 |
| <i>n</i> -BuOEt ( <i>C</i> <sub>s</sub> )              | 295.60               | 6.7                                                 | -1.5                 |
| <i>i</i> -BuOEt ( <i>C</i> <sub>1</sub> )              | 294.59               | 7.7                                                 | -1.0                 |
| <i>s</i> -BuOEt ( <i>C</i> <sub>1</sub> )              | 295.47               | 6.8                                                 | 24.5                 |
| <i>t</i> -BuOEt ( <i>C</i> <sub>1</sub> )              | 258.76               | 43.5                                                | 40.5                 |
| <i>n</i> -PeOEt ( <i>C</i> <sub>s</sub> )              | 295.54               | 6.8                                                 | 1.5                  |
| <i>neo</i> -PeOEt ( <i>C</i> <sub>s</sub> )            | 298.38               | 3.9                                                 | -3.5                 |
| <i>s</i> -PeOEt ( <i>C</i> <sub>1</sub> )              | 269.79               | 32.5                                                | 15.0                 |
| <i>n</i> -Pr <sub>2</sub> O ( <i>C</i> <sub>2v</sub> ) | 302.79               | -0.5                                                | -3.5                 |
| <i>n</i> -PrO <i>i</i> -Pr ( <i>C</i> <sub>1</sub> )   | 281.10               | 21.2                                                | 24.0                 |
| <i>i</i> -Pr <sub>2</sub> O ( <i>C</i> <sub>2</sub> )  | 258.88               | 43.4                                                | 52.5                 |
| <i>i</i> -PrO <i>t</i> -Bu ( <i>C</i> <sub>1</sub> )   | 242.24               | 60.1                                                | 62.5                 |
| <i>n</i> -Bu <sub>2</sub> O ( <i>C</i> <sub>2v</sub> ) | 299.45               | 2.8                                                 | -7.0 <sup>e</sup>    |
| <i>s</i> -Bu <sub>2</sub> O ( <i>C</i> <sub>2</sub> )  | 268.23               | 34.1                                                | 41.5                 |
| <i>t</i> -Bu <sub>2</sub> O ( <i>C</i> <sub>2</sub> )  | 224.81               | 77.5                                                | 76.0                 |
| <i>i</i> -Pe <sub>2</sub> O ( <i>C</i> <sub>2</sub> )  | 310.44               | -8.1                                                | -7.0 <sup>e</sup>    |

<sup>a</sup>Calculated with the GIAO (MP2) method under MP2/6-311++G(3df,3pd) (MP2/BSS-A).

<sup>b</sup>Symmetry. <sup>c</sup> $-\Delta\sigma^t_{\text{Me}_2\text{O}}(\text{O}) = -[\sigma^t(\text{O: S}) - \sigma^t(\text{O: Me}_2\text{O})] - 52.5$ . <sup>d</sup>Observed values taken from Refs. S1–S5, unless otherwise noted. Measured at 25 °C, pure liquids. <sup>e</sup>Measured at 100 °C.

**Table S8.** The  $\sigma^t(\text{O})$  and  $-\Delta\sigma^t_{\text{Me}_2\text{O}}(\text{O})$  values for some ether species calculated with B3LYP/def2TZVP, together with observed values.<sup>a</sup>

| Species (sym <sup>b</sup> )                    | $\sigma^t(\text{O})$ | $-\Delta\sigma^t_{\text{Me}_2\text{O}}(\text{O})^c$ | $\delta(\text{O})^d$ |
|------------------------------------------------|----------------------|-----------------------------------------------------|----------------------|
| <b>I (monomeric ethers)</b>                    |                      |                                                     |                      |
| Me <sub>2</sub> O (C <sub>2v</sub> )           | 322.43               | -52.5                                               | -52.5                |
| EtOMe (C <sub>s</sub> )                        | 292.19               | -22.3                                               | -22.5                |
| <i>n</i> -PrOMe (C <sub>s</sub> )              | 294.82               | -24.9                                               | -28.5                |
| <i>i</i> -PrOMe (C <sub>1</sub> )              | 281.97               | -12.0                                               | -2.0                 |
| <i>n</i> -BuOMe (C <sub>s</sub> )              | 295.58               | -25.7                                               | -28.5                |
| <i>i</i> -BuOMe (C <sub>1</sub> )              | 295.32               | -25.4                                               | -30.0                |
| <i>s</i> -BuOMe (C <sub>1</sub> )              | 297.88               | -27.9                                               | -8.5                 |
| <i>t</i> -BuOMe (C <sub>s</sub> )              | 263.62               | 6.3                                                 | 8.5                  |
| <i>n</i> -PeOMe (C <sub>s</sub> )              | 295.31               | -25.4                                               | -27.5                |
| <i>neo</i> -PeOMe (C <sub>s</sub> )            | 297.75               | -27.8                                               | -32.5                |
| <i>s</i> -PeOMe (C <sub>1</sub> )              | 272.31               | -2.4                                                | -16.5                |
| <i>i</i> -PeOMe (C <sub>1</sub> )              | 298.86               | -28.9                                               | -29.5                |
| <i>neo</i> -HexOMe (C <sub>s</sub> )           | 299.37               | -29.4                                               | -29.5                |
| Et <sub>2</sub> O (C <sub>2v</sub> )           | 260.28               | 9.7                                                 | 6.5                  |
| <i>n</i> -PrOEt (C <sub>s</sub> )              | 262.95               | 7.0                                                 | 1.7                  |
| <i>i</i> -PrOEt (C <sub>1</sub> )              | 249.16               | 20.8                                                | 28.0                 |
| <i>n</i> -BuOEt (C <sub>s</sub> )              | 263.81               | 6.1                                                 | -1.5                 |
| <i>i</i> -BuOEt (C <sub>1</sub> )              | 263.50               | 6.4                                                 | -1.0                 |
| <i>s</i> -BuOEt (C <sub>1</sub> )              | 264.84               | 5.1                                                 | 24.5                 |
| <i>t</i> -BuOEt (C <sub>1</sub> )              | 229.69               | 40.2                                                | 40.5                 |
| <i>n</i> -PeOEt (C <sub>s</sub> )              | 263.69               | 6.2                                                 | 1.5                  |
| <i>neo</i> -PeOEt (C <sub>s</sub> )            | 266.14               | 3.8                                                 | -3.5                 |
| <i>s</i> -PeOEt (C <sub>1</sub> )              | 239.32               | 30.6                                                | 15.0                 |
| <i>n</i> -Pr <sub>2</sub> O (C <sub>2v</sub> ) | 265.19               | 4.7                                                 | -3.5                 |
| <i>n</i> -PrO <i>i</i> -Pr (C <sub>1</sub> )   | 251.87               | 18.1                                                | 24.0                 |
| <i>i</i> -Pr <sub>2</sub> O (C <sub>2</sub> )  | 227.13               | 42.8                                                | 52.5                 |
| <i>i</i> -PrO <i>t</i> -Bu (C <sub>1</sub> )   | 212.37               | 57.6                                                | 62.5                 |
| <i>n</i> -Bu <sub>2</sub> O (C <sub>2v</sub> ) | 266.99               | 2.9                                                 | -7.0 <sup>e</sup>    |
| <i>s</i> -Bu <sub>2</sub> O (C <sub>2</sub> )  | 218.08               | 51.8                                                | 41.5                 |
| <i>t</i> -Bu <sub>2</sub> O (C <sub>2</sub> )  | 196.23               | 73.7                                                | 76.0                 |
| <i>i</i> -Pe <sub>2</sub> O (C <sub>2</sub> )  | 273.75               | -3.8                                                | -7.0 <sup>e</sup>    |

<sup>a</sup>Calculated with the GIAO-DFT (B3LYP) method under B3LYP/def2TZVP. <sup>b</sup>Symmetry. <sup>c</sup> $-\Delta\sigma^t_{\text{Me}_2\text{O}}(\text{O}) = -[\sigma^t(\text{O}: \text{S}) - \sigma^t(\text{O}: \text{Me}_2\text{O})] - 52.5$ . <sup>d</sup>Observed values taken from Refs. S1–S5, unless otherwise noted. Measured at 25 °C, pure liquids. <sup>e</sup>Measured at 100 °C.

**Table S9.**  $\sigma^d(\text{O})$ ,  $\sigma^p(\text{O})$ ,  $\sigma^t(\text{O})$  and  $-\Delta\sigma^t_{\text{Me}_2\text{O}}(\text{O})$  values of various isomer species with its energies calculated by using B3LYP/BSS-A.

| Species (sym) <sup>a</sup>                            | Energy/au   | $\sigma^d(\text{O})$ | $\sigma^p(\text{O})$ | $\sigma^t(\text{O})$ | $-\Delta\sigma^t(\text{O})^b$ |
|-------------------------------------------------------|-------------|----------------------|----------------------|----------------------|-------------------------------|
| <i>n</i> -PrOMe ( <b>18</b> )                         |             |                      |                      |                      |                               |
| <b>18</b> <sub>anti</sub> ( <i>C</i> <sub>s</sub> )   | -233.749331 | 400.83               | -105.99              | 294.84               | 113.48                        |
| <b>18</b> <sub>gauche</sub> ( <i>C</i> <sub>1</sub> ) | -233.749329 | 397.22               | -100.14              | 297.08               | 113.24                        |
| <i>n</i> -BuOMe ( <b>19</b> )                         |             |                      |                      |                      |                               |
| <b>19</b> <sub>anti</sub> ( <i>C</i> <sub>s</sub> )   | -273.076373 | 405.13               | -110.00              | 295.13               | 113.19                        |
| <b>19</b> <sub>gauche</sub> ( <i>C</i> <sub>1</sub> ) | -273.076479 | 397.94               | -102.51              | 295.43               | 112.90                        |
| <i>n</i> -Pr <sub>2</sub> O ( <b>23</b> )             |             |                      |                      |                      |                               |
| <b>23</b> <sub>anti</sub> ( <i>C</i> <sub>2v</sub> )  | -312.408573 | 397.47               | -132.00              | 265.47               | 142.86                        |
| <b>23</b> <sub>gauche</sub> ( <i>C</i> <sub>2</sub> ) | -312.408461 | 391.57               | -120.22              | 271.35               | 136.98                        |
| <i>n</i> -Bu <sub>2</sub> O ( <b>24</b> )             |             |                      |                      |                      |                               |
| <b>24</b> <sub>anti</sub> ( <i>C</i> <sub>2v</sub> )  | -391.062646 | 407.04               | -140.02              | 267.02               | 141.31                        |
| <b>24</b> <sub>gauche</sub> ( <i>C</i> <sub>2</sub> ) | -391.062769 | 393.26               | -124.74              | 268.52               | 139.81                        |

<sup>a</sup>Symmetry. <sup>b</sup> $-\Delta\sigma^t(\text{O}) = -[\sigma^t(\text{O}: \text{S}) - \sigma^t(\text{O}: \text{O}^{2-})]$ .

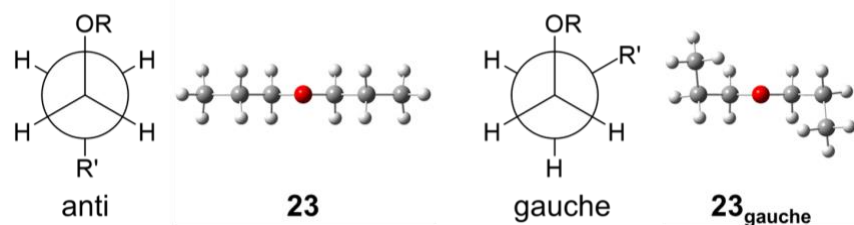

**Table S10.** The  $\sigma^t(\text{O})$  and  $-\Delta\sigma^t_{\text{Me}_2\text{O}}(\text{O})$  values (ppm) for some oxygen monomeric and dimeric species, together with observed values with the solvent effect of  $\text{CHCl}_3$ .<sup>a</sup>

| Species (sym <sup>b</sup> )                            | $\sigma^t(\text{O})$ | $-\Delta\sigma^t_{\text{Me}_2\text{O}}(\text{O})^c$ | $\delta(\text{O})^d$ |
|--------------------------------------------------------|----------------------|-----------------------------------------------------|----------------------|
| <b>I (monomeric ethers)</b>                            |                      |                                                     |                      |
| Me <sub>2</sub> O ( <i>C</i> <sub>2v</sub> )           | 325.20               | -52.5                                               | -52.5                |
| EtOMe ( <i>C</i> <sub>s</sub> )                        | 294.08               | -21.4                                               | -22.5                |
| <i>n</i> -PrOMe ( <i>C</i> <sub>s</sub> )              | 296.93               | -24.2                                               | -28.5                |
| <i>i</i> -PrOMe ( <i>C</i> <sub>1</sub> )              | 275.47               | -2.8                                                | -2.0                 |
| <i>n</i> -BuOMe ( <i>C</i> <sub>s</sub> )              | 297.51               | -24.8                                               | -28.5                |
| <i>i</i> -BuOMe ( <i>C</i> <sub>1</sub> )              | 297.50               | -24.8                                               | -30.0                |
| <i>s</i> -BuOMe ( <i>C</i> <sub>1</sub> )              | 281.45               | -8.7                                                | -8.5                 |
| <i>t</i> -BuOMe ( <i>C</i> <sub>s</sub> )              | 264.57               | 8.1                                                 | 8.5                  |
| <i>n</i> -PeOMe ( <i>C</i> <sub>s</sub> )              | 298.21               | -25.5                                               | -27.5                |
| <i>neo</i> -PeOMe ( <i>C</i> <sub>s</sub> )            | 300.96               | -28.3                                               | -32.5                |
| <i>s</i> -PeOMe ( <i>C</i> <sub>1</sub> )              | 280.01               | -7.3                                                | -16.5                |
| <i>i</i> -PeOMe ( <i>C</i> <sub>1</sub> )              | 301.36               | -28.7                                               | -29.5                |
| <i>neo</i> -HexOMe ( <i>C</i> <sub>s</sub> )           | 300.81               | -28.1                                               | -29.5                |
| Et <sub>2</sub> O ( <i>C</i> <sub>2v</sub> )           | 262.31               | 10.4                                                | 6.5                  |
| <i>n</i> -PrOEt ( <i>C</i> <sub>s</sub> )              | 264.19               | 8.5                                                 | 1.7                  |
| <i>i</i> -PrOEt ( <i>C</i> <sub>1</sub> )              | 242.35               | 30.4                                                | 28.0                 |
| <i>n</i> -BuOEt ( <i>C</i> <sub>s</sub> )              | 266.15               | 6.6                                                 | -1.5                 |
| <i>i</i> -BuOEt ( <i>C</i> <sub>1</sub> )              | 265.56               | 7.1                                                 | -1.0                 |
| <i>s</i> -BuOEt ( <i>C</i> <sub>1</sub> )              | 248.33               | 24.4                                                | 24.5                 |
| <i>t</i> -BuOEt ( <i>C</i> <sub>1</sub> )              | 230.26               | 42.4                                                | 40.5                 |
| <i>n</i> -PeOEt ( <i>C</i> <sub>s</sub> )              | 265.69               | 7.0                                                 | 1.5                  |
| <i>neo</i> -PeOEt ( <i>C</i> <sub>s</sub> )            | 269.58               | 3.1                                                 | -3.5                 |
| <i>s</i> -PeOEt ( <i>C</i> <sub>1</sub> )              | 247.20               | 25.5                                                | 15.0                 |
| <i>n</i> -Pr <sub>2</sub> O ( <i>C</i> <sub>2v</sub> ) | 267.13               | 5.6                                                 | -3.5                 |
| <i>n</i> -PrO <i>i</i> -Pr ( <i>C</i> <sub>1</sub> )   | 244.72               | 28.0                                                | 24.0                 |
| <i>i</i> -Pr <sub>2</sub> O ( <i>C</i> <sub>2</sub> )  | 224.72               | 48.0                                                | 52.5                 |
| <i>i</i> -PrO <i>t</i> -Bu ( <i>C</i> <sub>1</sub> )   | 209.62               | 63.1                                                | 62.5                 |
| <i>n</i> -Bu <sub>2</sub> O ( <i>C</i> <sub>2v</sub> ) | 270.21               | 2.5                                                 | -7.0 <sup>e</sup>    |
| <i>s</i> -Bu <sub>2</sub> O ( <i>C</i> <sub>2</sub> )  | 235.98               | 36.7                                                | 41.5                 |
| <i>t</i> -Bu <sub>2</sub> O ( <i>C</i> <sub>2</sub> )  | 196.82               | 75.9                                                | 76.0                 |
| <i>i</i> -Pe <sub>2</sub> O ( <i>C</i> <sub>2</sub> )  | 275.48               | -2.8                                                | -7.0 <sup>e</sup>    |

<sup>a</sup>Calculated with the GIAO-DFT (B3LYP) method under B3LYP/6-311++G(3df,3pd) (B3LYP/BSS-A). <sup>b</sup>Symmetry. <sup>c</sup> $-\Delta\sigma^t_{\text{Me}_2\text{O}}(\text{O}) = -[\sigma^t(\text{O}: \text{S}) - \sigma^t(\text{O}: \text{Me}_2\text{O})] - 52.5$ . <sup>d</sup>Observed values taken from Refs. S1–S5, unless otherwise noted. Measured at 25 °C, pure liquids. <sup>e</sup>Measured at 100 °C.

(Table S10 continued)

| Species (sym <sup>b</sup> )             | $\sigma^t(\text{O})$ | $-\Delta\sigma^t_{\text{Me}_2\text{O}}(\text{O})^c$ | $\delta(\text{O})^d$ |
|-----------------------------------------|----------------------|-----------------------------------------------------|----------------------|
| (Me <sub>2</sub> O (C <sub>2v</sub> ))  | 325.20               | -52.5                                               | -52.5)               |
| <b>II (monomeric alcohols)</b>          |                      |                                                     |                      |
| MeOH (C <sub>s</sub> )                  | 327.13               | -54.4                                               | -37                  |
| EtOH (C <sub>s</sub> )                  | 294.41               | -21.7                                               | 6                    |
| <i>n</i> -PrOH (C <sub>s</sub> )        | 296.20               | -23.5                                               | 0                    |
| <i>i</i> -PrOH (C <sub>1</sub> )        | 255.91               | 16.8                                                | 38                   |
| <i>n</i> -BuOH (C <sub>s</sub> )        | 296.98               | -24.3                                               | -4                   |
| <i>i</i> -BuOH (C <sub>1</sub> )        | 297.22               | -24.5                                               | -2                   |
| <i>s</i> -BuOH (C <sub>1</sub> )        | 261.70               | 11.0                                                | <b>34</b>            |
| <i>t</i> -BuOH (C <sub>s</sub> )        | 231.46               | 41.2                                                | 70                   |
| <i>n</i> -PeOH (C <sub>s</sub> )        | 296.73               | -24.0                                               | -7                   |
| <b>III (monomeric carboxylic acids)</b> |                      |                                                     |                      |
| HC(=O)OH (C <sub>s</sub> )              | 15.45 <sup>f</sup>   | 257.3                                               | 253 <sup>g</sup>     |
| =O                                      | -82.86               |                                                     |                      |
| -OH                                     | 113.76               |                                                     |                      |
| MeC(=O)OH (C <sub>s</sub> )             | 15.36 <sup>f</sup>   | 257.3                                               | 251 <sup>g</sup>     |
| =O                                      | -85.09               |                                                     |                      |
| -OH                                     | 115.81               |                                                     |                      |
| EtC(=O)OH (C <sub>s</sub> )             | 22.39 <sup>f</sup>   | 250.3                                               | 244 <sup>g</sup>     |
| =O                                      | -74.74               |                                                     |                      |
| -OH                                     | 119.52               |                                                     |                      |
| <i>i</i> -PrC(=O)OH (C <sub>1</sub> )   | 25.72 <sup>f</sup>   | 247.0                                               | 242 <sup>g</sup>     |
| =O                                      | -66.23               |                                                     |                      |
| -OH                                     | 117.67               |                                                     |                      |
| <i>t</i> -BuC(=O)OH (C <sub>s</sub> )   | 24.16 <sup>f</sup>   | 248.5                                               | 240 <sup>g,h</sup>   |
| =O                                      | -73.37               |                                                     |                      |
| -OH                                     | 121.70               |                                                     |                      |

<sup>a</sup>Calculated with the GIAO-DFT (B3LYP) method under B3LYP/6-311++G(3df,3pd) (B3LYP/BSS-A). <sup>b</sup>Symmetry. <sup>c</sup> $-\Delta\sigma^t_{\text{Me}_2\text{O}}(\text{O}) = -[\sigma^t(\text{O}: \text{S}) - \sigma^t(\text{O}: \text{Me}_2\text{O})] - 52.5$ . <sup>d</sup>Observed values taken from Refs. S1–S5, unless otherwise noted. Measured at 25 °C, pure liquids. <sup>e</sup>Measured at 100 °C. <sup>f</sup> $\sigma^t(\text{O})$  was given as the average value of the oxygen at the carbonyl and hydroxy groups. <sup>g</sup>Due to rapid proton exchange, only one peak appeared. <sup>h</sup>Measured at 40 °C.

(Table S10 continued)

| Species (sym <sup>b</sup> )         | $\sigma^t(\text{O})$ | $-\Delta\sigma^t_{\text{Me}_2\text{O}(\text{O})}^c$ | $\delta(\text{O})^d$ |
|-------------------------------------|----------------------|-----------------------------------------------------|----------------------|
| <i>cf:</i>                          |                      |                                                     |                      |
| Me <sub>2</sub> O (C <sub>1</sub> ) | 561.36               | -51.1                                               | -52.5                |
| Unit 1                              | 322.57               |                                                     |                      |
| Unit 2                              | 320.04               |                                                     |                      |
| <b>IV (dimeric alcohols)</b>        |                      |                                                     |                      |
| MeOH (C <sub>1</sub> )              | 325.08               | -52.4                                               | -37                  |
| Acceptor                            | 319.79               |                                                     |                      |
| Donor                               | 330.36               |                                                     |                      |
| EtOH (C <sub>1</sub> )              | 288.60               | -15.9                                               | 6                    |
| Acceptor                            | 287.91               |                                                     |                      |
| Donor                               | 289.29               |                                                     |                      |
| <i>n</i> -PrOH (C <sub>1</sub> )    | 290.61               | -17.9                                               | 0                    |
| Acceptor                            | 289.53               |                                                     |                      |
| Donor                               | 291.70               |                                                     |                      |
| <i>i</i> -PrOH (C <sub>1</sub> )    | 251.49               | 21.2                                                | 38                   |
| Acceptor                            | 248.39               |                                                     |                      |
| Donor                               | 254.59               |                                                     |                      |
| <i>n</i> -BuOH (C <sub>1</sub> )    | 291.42               | -18.7                                               | -4                   |
| Acceptor                            | 290.06               |                                                     |                      |
| Donor                               | 292.78               |                                                     |                      |
| <i>i</i> -BuOH (C <sub>1</sub> )    | 292.42               | -19.7                                               | -2                   |
| Acceptor                            | 290.55               |                                                     |                      |
| Donor                               | 294.29               |                                                     |                      |
| <i>s</i> -BuOH (C <sub>1</sub> )    | 259.27               | 13.4                                                | 34                   |
| Acceptor                            | 256.10               |                                                     |                      |
| Donor                               | 262.43               |                                                     |                      |
| <i>t</i> -BuOH (C <sub>1</sub> )    | 226.22               | 46.5                                                | 70                   |
| Acceptor                            | 222.05               |                                                     |                      |
| Donor                               | 230.39               |                                                     |                      |
| <i>n</i> -PeOH (C <sub>1</sub> )    | 291.27               | -18.6                                               | -7                   |
| Acceptor                            | 290.17               |                                                     |                      |
| Donor                               | 292.38               |                                                     |                      |

<sup>a</sup>Calculated with the GIAO-DFT (B3LYP) method under B3LYP/6-311++G(3df,3pd) (B3LYP/BSS-A). <sup>b</sup>Symmetry. <sup>c</sup> $-\Delta\sigma^t_{\text{Me}_2\text{O}(\text{O})} = -[\sigma^t(\text{O}: \text{S}) - \sigma^t(\text{O}: \text{Me}_2\text{O})] - 52.5$ . <sup>d</sup>Observed values taken from Refs. S1–S5, unless otherwise noted. Measured at 25 °C, pure liquids.



(Table S10 continued)

| Species (sym <sup>b</sup> )                                 | $\sigma^t(\text{O})$ | $-\Delta\sigma^t_{\text{Me}_2\text{O}(\text{O})}^c$ | $\delta(\text{O})^d$ |
|-------------------------------------------------------------|----------------------|-----------------------------------------------------|----------------------|
| <b>V (dimeric carboxylic acids)</b>                         |                      |                                                     |                      |
| HC(=O)OH ( <i>C</i> <sub>s</sub> )                          | 23.96 <sup>f</sup>   | 248.7                                               | 253 <sup>g</sup>     |
| Acceptor                                                    | -47.52               |                                                     |                      |
| Donor                                                       | 95.44                |                                                     |                      |
| MeC(=O)OH ( <i>C</i> <sub>2h</sub> )                        | 26.30 <sup>f</sup>   | 246.4                                               | 251 <sup>g</sup>     |
| Acceptor                                                    | -48.42               |                                                     |                      |
| Donor                                                       | 101.03               |                                                     |                      |
| EtC(=O)OH ( <i>C</i> <sub>2h</sub> )                        | 32.67 <sup>f</sup>   | 240.0                                               | 244 <sup>g</sup>     |
| Acceptor                                                    | -39.75               |                                                     |                      |
| Donor                                                       | 105.09               |                                                     |                      |
| <i>i</i> -PrC(=O)OH ( <i>C</i> <sub>i</sub> ) <sup>i</sup>  | 36.65 <sup>f</sup>   | 236.1                                               | 242 <sup>g</sup>     |
| Acceptor                                                    | -28.81               |                                                     |                      |
| Donor                                                       | 102.11               |                                                     |                      |
| <i>t</i> -BuC(=O)OH ( <i>C</i> <sub>2h</sub> ) <sup>i</sup> | 35.48 <sup>f</sup>   | 237.2                                               | 240 <sup>g,h</sup>   |
| Acceptor                                                    | -37.57               |                                                     |                      |
| Donor                                                       | 108.53               |                                                     |                      |

<sup>a</sup>Calculated with the GIAO-DFT (B3LYP) method under B3LYP/6-311++G(3df,3pd) (B3LYP/BSS-A). <sup>b</sup>Symmetry. <sup>c</sup> $-\Delta\sigma^t_{\text{Me}_2\text{O}(\text{O})} = -[\sigma^t(\text{O}: \text{S}) - \sigma^t(\text{O}: \text{Me}_2\text{O})] - 52.5$ . <sup>d</sup>Observed values taken from Refs. S1–S5, unless otherwise noted. Measured at 25 °C, pure liquids. <sup>e</sup>Measured at 100 °C. <sup>f</sup> $\sigma^t(\text{O})$  was given as the average value of the oxygen at the carbonyl and hydroxy groups. <sup>g</sup>Due to rapid proton exchange, only one peak appeared. <sup>h</sup>Measured at 40 °C. <sup>i</sup>The optimization was conducted with tight convergence criteria and an ultrafine grid.

**Table S11.** Parameters for **1–36** of regression lines ( $\sigma_{functional}^t = a \cdot \sigma_{B3LYP}^t + b$ ), except OH<sup>+</sup> (**30**) and values of  $R^2$  for each functional over the basis set as BSS-A.

| Functional       | $a$    | $b$    | $R_c^2$ | MAE   | max. AE                    |
|------------------|--------|--------|---------|-------|----------------------------|
| CAM-B3LYP        | 0.9979 | 13.73  | 0.9930  | 13.47 | 63.17 (EtO <sup>-</sup> )  |
| PBE              | 1.0145 | -17.37 | 0.9889  | 14.33 | 84.09 (EtO <sup>-</sup> )  |
| PBE0             | 0.9935 | 12.11  | 0.9983  | 10.61 | 31.54 (EtO <sup>-</sup> )  |
| LC- $\omega$ PBE | 0.9812 | 31.96  | 0.9750  | 27.59 | 120.08 (EtO <sup>-</sup> ) |
| $\omega$ B97X-D  | 0.9822 | 21.21  | 0.9894  | 17.07 | 78.75 (EtO <sup>-</sup> )  |

**Table S12.** Parameters for various oxygen species of regression lines ( $\delta = a \cdot \sigma_{functional}^t + b$ ) and values of  $R_c^2$  for correlations of  $\delta(\text{O: S})$  versus  $-\Delta\sigma_{\text{Me}_2\text{O}(\text{O: S})}^t$  for each functional over the basis set as BSS-A<sup>a,b</sup>.

| Functional       | $a$   | $b$    | $R_c^2$ | MAE   | max. AE                             |
|------------------|-------|--------|---------|-------|-------------------------------------|
| B3LYP            | 1.030 | 6.895  | 0.900   | 46.40 | 66.1 ( <i>n</i> -Bu <sub>2</sub> O) |
| CAM-B3LYP        | 1.078 | 6.037  | 0.926   | 39.26 | 58.1 ( <i>n</i> -Bu <sub>2</sub> O) |
| PBE              | 0.916 | -5.077 | 0.877   | 55.16 | 76.0 ( <i>n</i> -Bu <sub>2</sub> O) |
| PBE0             | 1.077 | 6.958  | 0.924   | 39.87 | 58.7 ( <i>n</i> -Bu <sub>2</sub> O) |
| LC- $\omega$ PBE | 1.156 | 8.581  | 0.950   | 29.54 | 46.6 ( <i>n</i> -Bu <sub>2</sub> O) |
| $\omega$ B97X-D  | 1.110 | 9.409  | 0.898   | 36.09 | 55.0 ( <i>n</i> -Bu <sub>2</sub> O) |

<sup>a</sup>Species selected some alcohols and ethers which measured values exist, MeOH (**8**), EtOH (**9**), *i*-PrOH (**10**), *t*-BuOH (**11**), *n*-PrOH (**12**), *n*-BuOH (**13**), Me<sub>2</sub>O (**14**), EtOMe (**15**), *i*-PrOMe (**16**), *t*-BuOMe (**17**), *n*-PrOMe (**18**), *n*-BuOMe (**19**), Et<sub>2</sub>O (**20**), *i*-Pr<sub>2</sub>O (**21**), *t*-Bu<sub>2</sub>O (**22**), *n*-Pr<sub>2</sub>O (**23**), *n*-Bu<sub>2</sub>O (**24**) and CH<sub>2</sub>=CHOMe (**32**). <sup>b</sup>Observed values taken from Refs. 1, 2 and 9 unless otherwise noted. Measured at 25 °C, pure liquids.

**Table S13.** The  $\sigma^d(\text{O})$ ,  $\sigma^p(\text{O})$ ,  $\sigma^t(\text{O})$  and  $\Delta\sigma^t(\text{O})$  values for some oxygen species calculated with B3LYP/6-311+G(3d,3p)//B3LYP/6-311++G(3df,3pd) (B3LYP/BSS-B//B3LYP/BSS-A), together with the pre- $\alpha$ ,  $\alpha$ ,  $\beta$ ,  $\gamma$  and  $\delta$  effects, corresponding to the  $-\Delta\sigma^t(\text{O})$  values.

| Species (sym) <sup>a</sup>                        | $\sigma^d(\text{O})$ | $\sigma^p(\text{O})$ | $\sigma^t(\text{O})$ | $-\Delta\sigma^t(\text{O})^b$ | effect                        |
|---------------------------------------------------|----------------------|----------------------|----------------------|-------------------------------|-------------------------------|
| O <sup>2-</sup> (O <sub>h</sub> )                 | 408.29               | 0.00                 | 408.29               | 0.00                          | ---                           |
| OH <sup>-</sup> (C <sub>∞v</sub> )                | 392.62               | -30.73               | 361.89               | 46.40                         | pre- $\alpha$                 |
| MeO <sup>-</sup> (C <sub>3v</sub> )               | 400.59               | -104.61              | 295.99               | 112.30                        | $\alpha$                      |
| EtO <sup>-</sup> (C <sub>s</sub> )                | 410.89               | -249.76              | 161.13               | 247.16                        | $\beta$                       |
| <i>i</i> -PrO <sup>-</sup> (C <sub>s</sub> )      | 423.45               | -278.77              | 144.67               | 263.62                        | $\beta$                       |
| <i>t</i> -BuO <sup>-</sup> (C <sub>s</sub> )      | 437.53               | -236.60              | 200.93               | 207.36                        | $\beta$                       |
| H <sub>2</sub> O (C <sub>2v</sub> )               | 387.38               | -61.88               | 325.50               | 82.79                         | pre- $\alpha$                 |
| MeOH (C <sub>s</sub> )                            | 391.84               | -71.40               | 320.44               | 87.85                         | $\alpha$                      |
| EtOH (C <sub>s</sub> )                            | 399.61               | -107.28              | 292.33               | 115.96                        | $\beta$                       |
| <i>i</i> -PrOH (C <sub>1</sub> )                  | 403.12               | -153.69              | 249.42               | 158.87                        | $\beta$                       |
| <i>t</i> -BuOH (C <sub>s</sub> )                  | 415.38               | -189.87              | 225.51               | 182.78                        | $\beta$                       |
| <i>n</i> -PrOH (C <sub>s</sub> )                  | 399.71               | -109.58              | 290.13               | 118.16                        | $\gamma$                      |
| <i>n</i> -BuOH (C <sub>s</sub> )                  | 405.44               | -114.48              | 290.95               | 117.34                        | $\delta$                      |
| Me <sub>2</sub> O (C <sub>2v</sub> )              | 398.00               | -77.31               | 320.69               | 87.60                         | $\alpha$                      |
| EtOMe (C <sub>s</sub> )                           | 401.99               | -111.82              | 290.17               | 118.12                        | $\beta$                       |
| <i>i</i> -PrOMe (C <sub>1</sub> )                 | 407.03               | -135.15              | 271.88               | 136.41                        | $\beta$                       |
| <i>t</i> -BuOMe (C <sub>s</sub> )                 | 413.86               | -151.36              | 262.50               | 145.79                        | $\beta$                       |
| <i>n</i> -PrOMe (C <sub>s</sub> )                 | 407.69               | -114.21              | 293.48               | 114.81                        | $\gamma$                      |
| <i>n</i> -BuOMe (C <sub>s</sub> )                 | 413.98               | -120.71              | 293.27               | 115.02                        | $\delta$                      |
| Et <sub>2</sub> O (C <sub>2v</sub> )              | 405.93               | -145.88              | 260.06               | 148.23                        | $\beta$                       |
| <i>i</i> -Pr <sub>2</sub> O (C <sub>2</sub> )     | 408.05               | -185.47              | 222.58               | 185.71                        | $\beta$                       |
| <i>t</i> -Bu <sub>2</sub> O (C <sub>2</sub> )     | 403.82               | -208.74              | 195.08               | 213.21                        | $\beta$                       |
| <i>n</i> -Pr <sub>2</sub> O (C <sub>2v</sub> )    | 411.26               | -146.93              | 264.33               | 143.96                        | $\gamma$                      |
| <i>n</i> -Bu <sub>2</sub> O (C <sub>2v</sub> )    | 420.03               | -153.88              | 266.15               | 142.14                        | $\delta$                      |
| H <sub>3</sub> O <sup>+</sup> (C <sub>3v</sub> )  | 391.75               | -88.37               | 303.38               | 104.91                        | pre- $\alpha$                 |
| MeH <sub>2</sub> O <sup>+</sup> (C <sub>s</sub> ) | 399.18               | -95.08               | 304.10               | 104.19                        | $\alpha$                      |
| EtH <sub>2</sub> O <sup>+</sup> (C <sub>1</sub> ) | 407.96               | -133.32              | 274.64               | 133.65                        | $\beta$                       |
| Me <sub>3</sub> O <sup>+</sup> (C <sub>3v</sub> ) | 428.83               | -133.83              | 295.01               | 113.28                        | $\alpha$                      |
| Et <sub>3</sub> O <sup>+</sup> (C <sub>3</sub> )  | 440.97               | -203.75              | 237.22               | 171.07                        | $\beta$                       |
| OH <sup>+</sup> (C <sub>∞v</sub> )                | 384.99               | 1021.20              | 1406.19              | -997.90                       | pre- $\alpha$                 |
| H <sub>2</sub> C=CHOH (C <sub>s</sub> )           | 402.08               | -194.59              | 207.50               | 200.79                        | C=C                           |
| H <sub>2</sub> C=CHOMe (C <sub>s</sub> )          | 402.95               | -176.48              | 226.46               | 181.83                        | C=C                           |
| PhOH (C <sub>s</sub> )                            | 386.96               | -180.13              | 206.83               | 201.46                        | C <sub>6</sub> H <sub>5</sub> |
| H <sub>2</sub> C=O (C <sub>2v</sub> )             | 396.79               | -824.78              | -427.99              | 836.28                        | C=O                           |
| HC(=O*)OH (C <sub>s</sub> )                       | 396.45               | -497.88              | -101.43              | 509.72                        | OC=O                          |
| HC(=O)O*H (C <sub>s</sub> )                       | 397.93               | -284.07              | 113.86               | 294.43                        | OC=O                          |

<sup>a</sup>Symmetry. <sup>b</sup> $-\Delta\sigma^t(\text{O}) = -[\sigma^t(\text{O: S}) - \sigma^t(\text{O: O}^{2-})]$ .

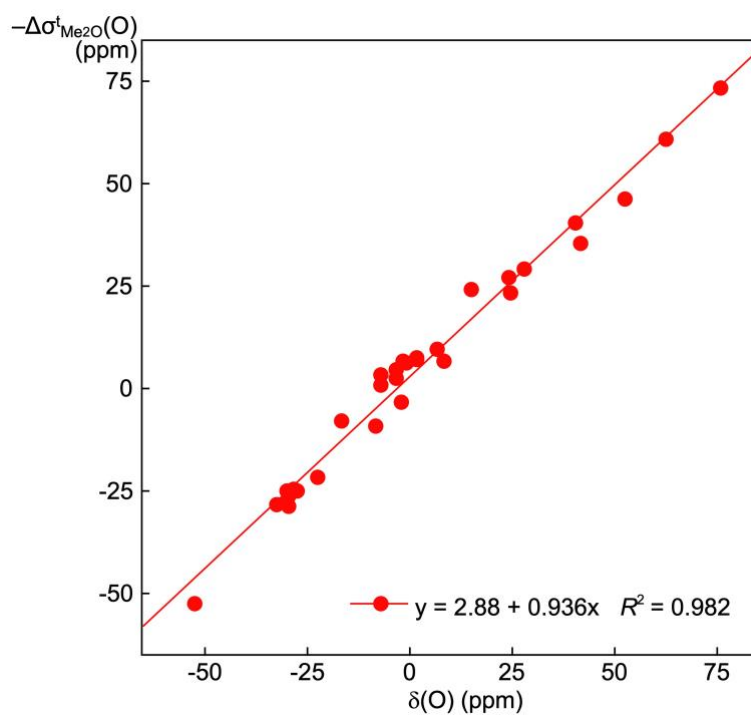

**Fig. S1** Plot of observed values ( $\delta$ ) versus calculated chemical shift values [ $-\Delta\sigma^t(\text{O})$ ] under B3LYP/BSS-A.

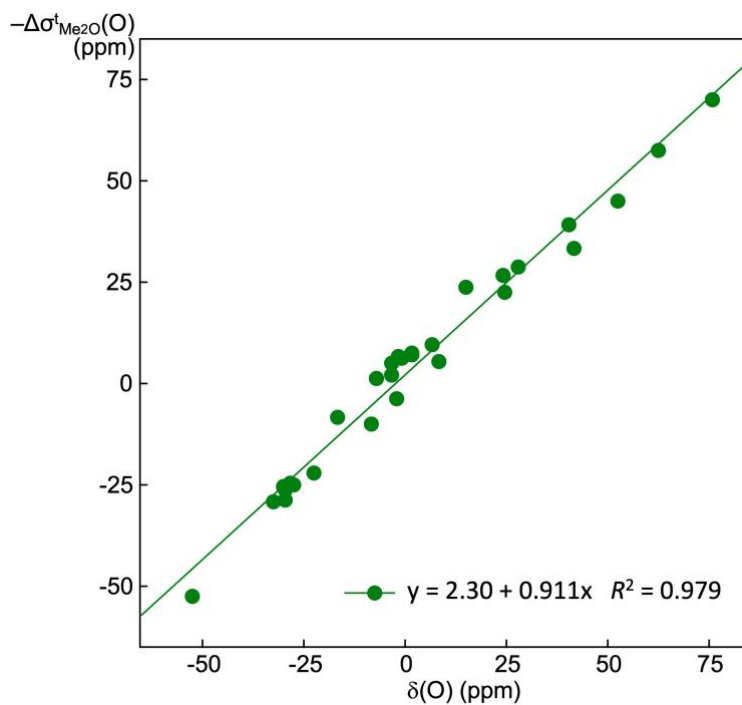

**Fig. S2** Plot of observed values ( $\delta$ ) versus calculated chemical shift values [ $-\Delta\sigma^t(\text{O})$ ] under CAM-B3LYP/BSS-A.

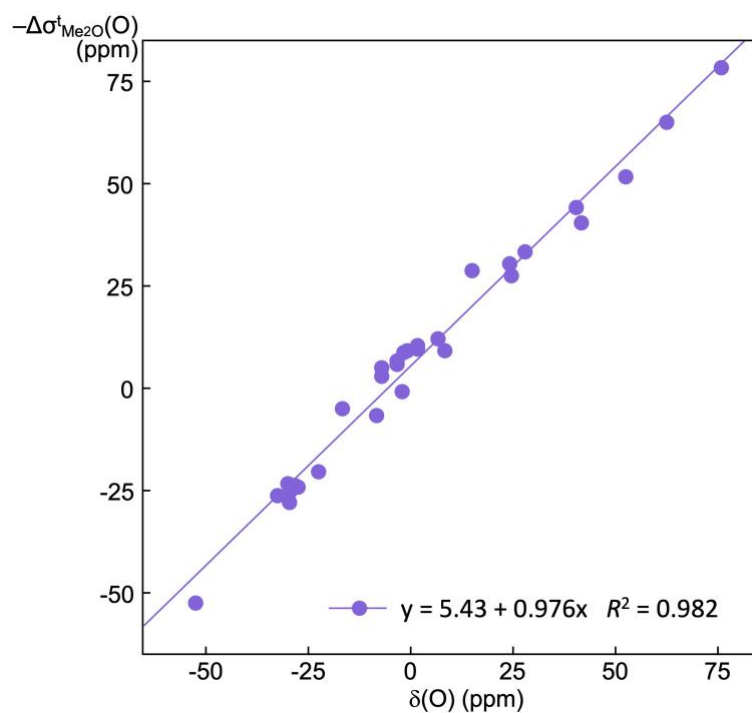

**Fig. S3** Plot of observed values ( $\delta$ ) versus calculated chemical shift values [ $-\Delta\sigma^t(\text{O})$ ] under PBE/BSS-A.

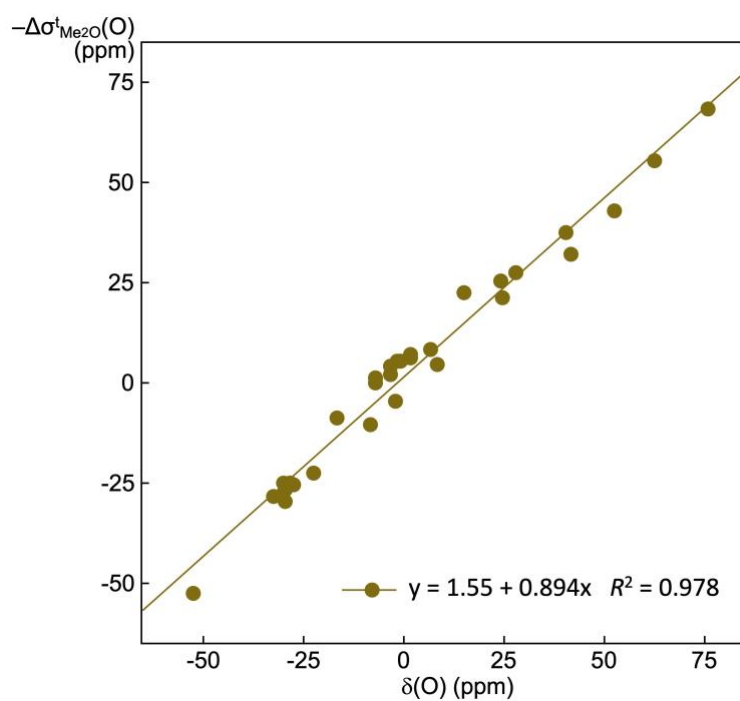

**Fig. S4** Plot of observed values ( $\delta$ ) versus calculated chemical shift values [ $-\Delta\sigma^t(\text{O})$ ] under PBE0/BSS-A.

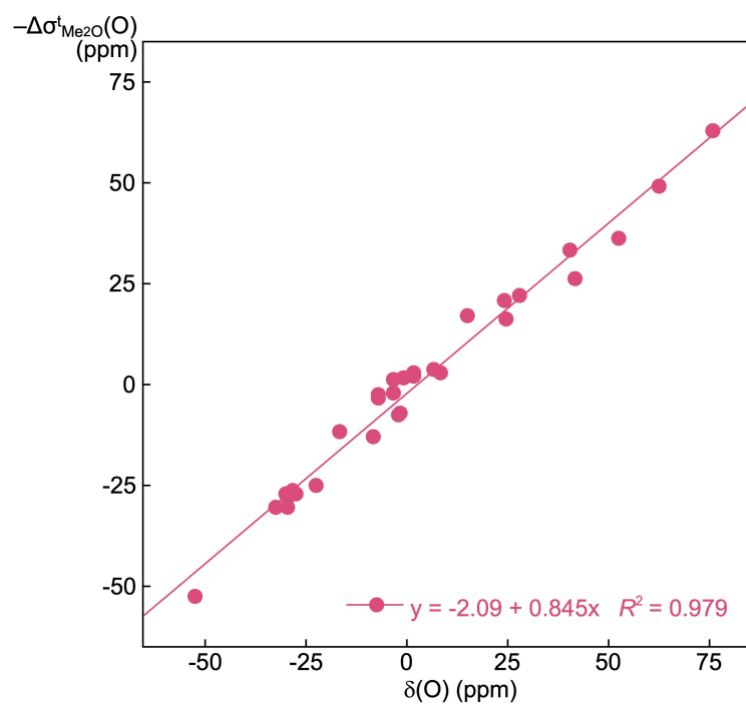

**Fig. S5** Plot of observed values ( $\delta$ ) versus calculated chemical shift values [ $-\Delta\sigma^t(\text{O})$ ] under LC- $\omega$ PBE/BSS-A.

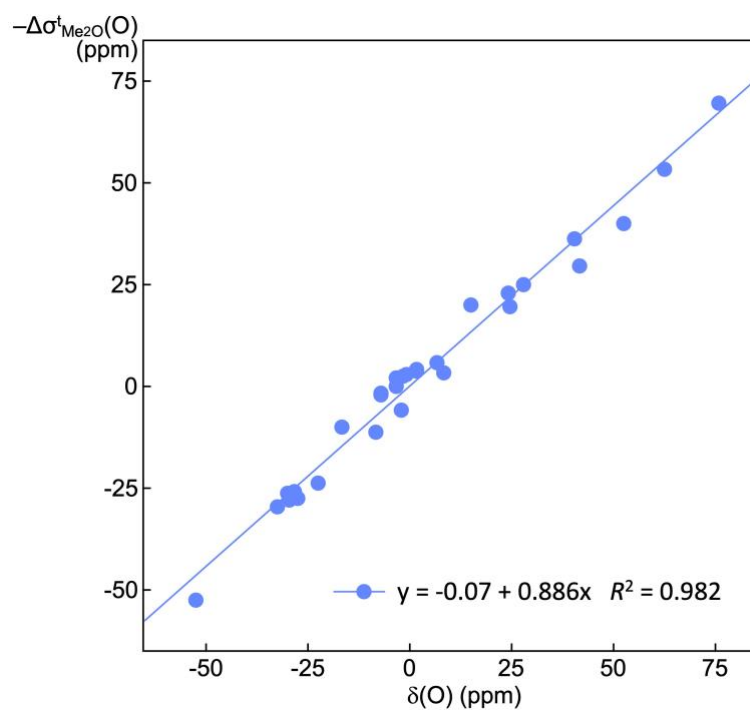

**Fig. S6** Plot of observed values ( $\delta$ ) versus calculated chemical shift values [ $-\Delta\sigma^t(\text{O})$ ] under  $\omega$ B97X-D/BSS-A.

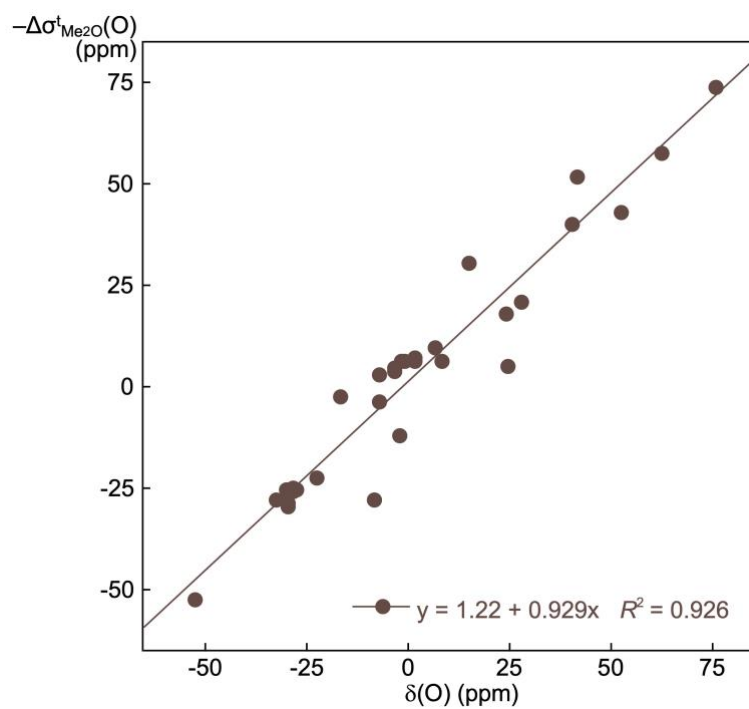

**Fig. S7** Plot of observed values ( $\delta$ ) versus calculated chemical shift values [ $-\Delta\sigma^d(\text{O})$ ] under B3LYP/def2TZVP.

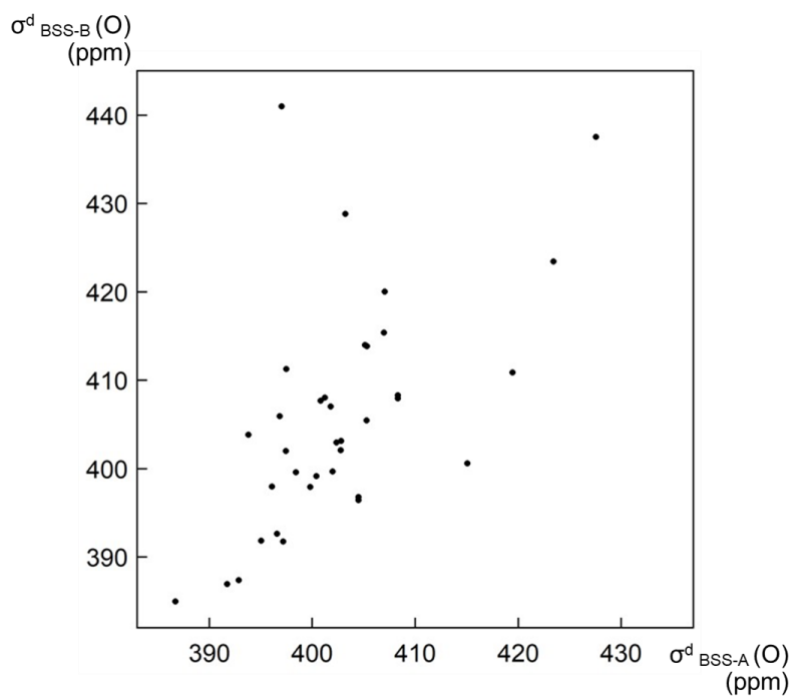

**Fig. S8** Plot of  $\sigma^d(\text{O})$  calculated under B3LYP/BSS-B//B3LYP/BSS-A versus those under B3LYP/BSS-A.

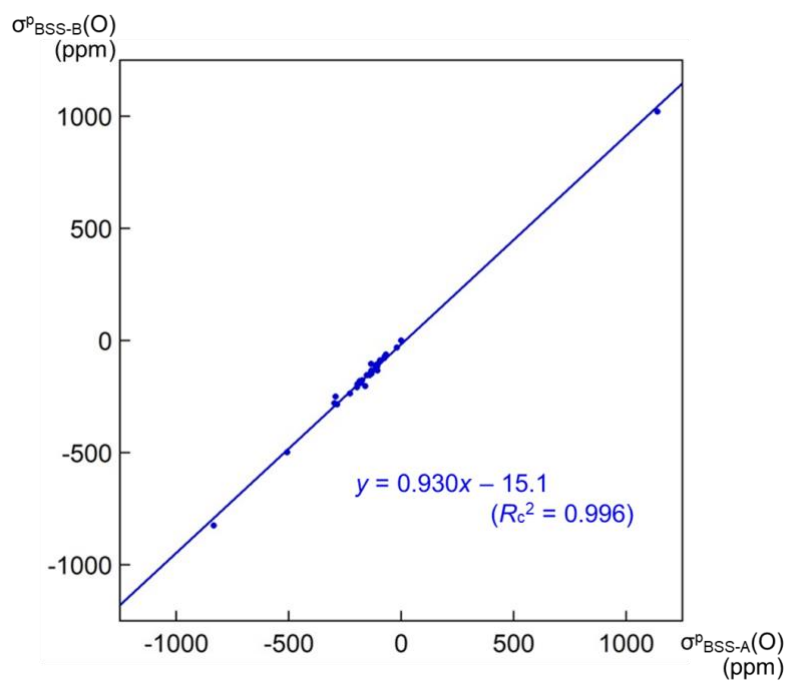

**Fig. S9** Plot of  $\sigma^p(\text{O})$  calculated under B3LYP/BSS-B//B3LYP/BSS-A versus those under B3LYP/BSS-A.

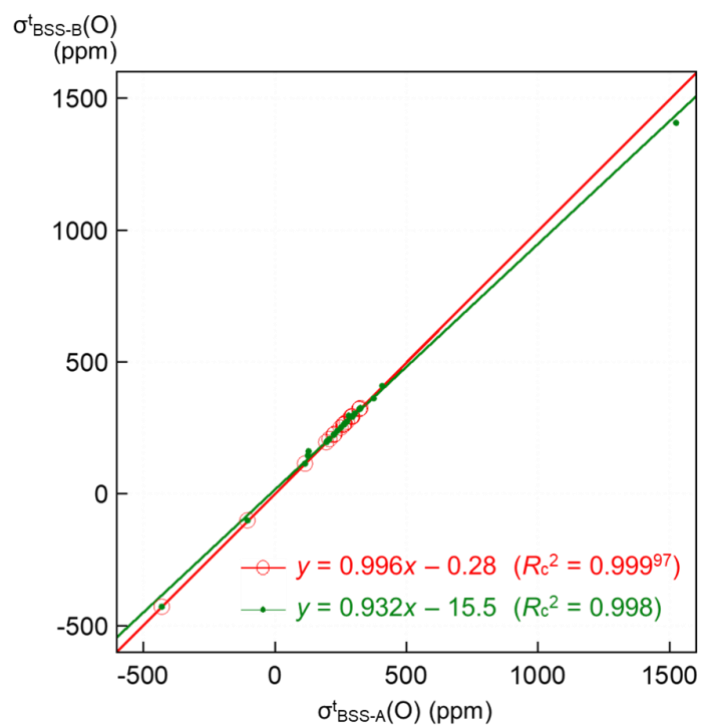

**Fig. S10** Plot of  $\sigma^t(\text{O})$  calculated under B3LYP/BSS-B//B3LYP/BSS-A versus those under B3LYP/BSS-A. All data are shown by green dots and those in neutral species by red circles.



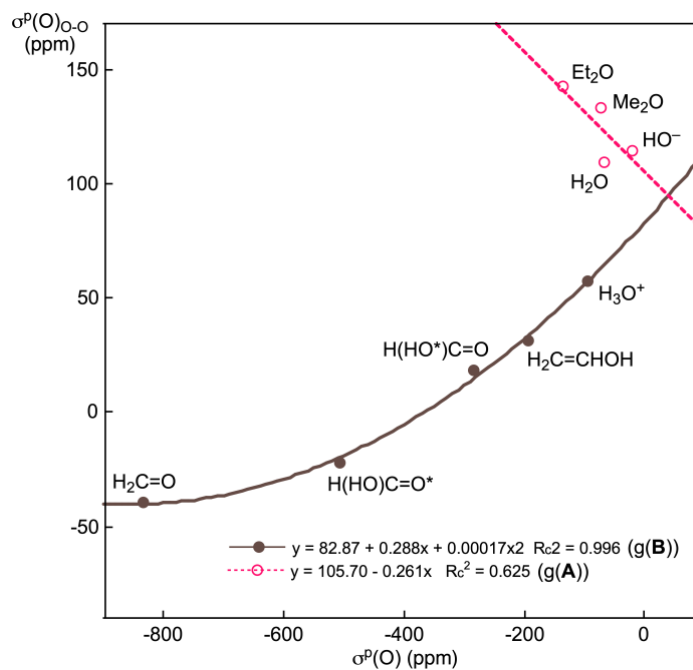

**Fig. S11** Plots of  $\sigma^P(\text{O})_{\text{O-O}}$  versus  $\sigma^P(\text{O})$  under B3LYP/BSS-A. The correlations were poor for g(A) ( $y = 105.70 - 0.261x$ ;  $R_c^2 = 0.625$ ) and very good for g(B) ( $y = 82.87 + 0.288x + 0.00017x^2$ ;  $R_c^2 = 0.996$ ).

## References

- S1. J.-P. Kintzinger, *Oxygen NMR. Characteristic Parameters and Applications in Oxygen-17 and Silicon-29* (NMR Basic Principles and Progress), eds. by P. Diehl, E. Fluck, R. Kosfeld, Springer, Berlin pp. 1–64, 1981.
- S2. C. Delseth, Thèse, Université de Lausanne, Février 1977. (Chemical shifts of ethers and carboxylic acids)
- S3. C. Delseth, J.-P. Kintzinger, *Helv. Chim. Acta.* **1978**, *61*, 1327–1334. (Chemical shifts of ethers)
- S4. H. A. Christ, P. Diehl, Hr. Schneider, H. Dahn, *Helv. Chim. Acta.* **1961**, *44*, 865–880. (Chemical shifts of alcohols)
- S5. G. A. Kalabin, D. F. Kushnarev, R. B. Valeyev, B. A. Trofimov, and M. A. Fedotov, *Org. Magn. Reson.* **1982**, *18*, 1–9. (Chemical shifts of methyl vinyl ether. CCl<sub>4</sub> was used as a solvent.)

### Optimized structures given by Cartesian coordinates

Optimized structures given by Cartesian coordinates for examined molecules, together with the total energies with the B3LYP/BSS-A method of the Gaussian 09 program.

Compound **1: O<sup>2-</sup>**  
Symmetry  $O_h$   
energy  $E_h = -74.8820358$  au  
Standard orientation

|   |   |          |          |          |
|---|---|----------|----------|----------|
| 8 | 0 | 0.000000 | 0.000000 | 0.000000 |
|---|---|----------|----------|----------|

Compound **2: OH<sup>-</sup>**  
Symmetry  $C_{\infty v}$   
energy  $E_h = -75.8309271$  au  
Standard orientation

|   |   |          |          |           |
|---|---|----------|----------|-----------|
| 8 | 0 | 0.000000 | 0.000000 | 0.107170  |
| 1 | 0 | 0.000000 | 0.000000 | -0.857363 |

Compound **3: MeO<sup>-</sup>**  
Symmetry  $C_{3v}$   
energy  $E_h = -115.1550451$  au  
Standard orientation

|   |   |           |           |           |
|---|---|-----------|-----------|-----------|
| 8 | 0 | 0.000000  | 0.000000  | 0.791502  |
| 6 | 0 | 0.000000  | 0.000000  | -0.538646 |
| 1 | 0 | 0.000000  | 1.024442  | -1.033380 |
| 1 | 0 | 0.887193  | -0.512221 | -1.033380 |
| 1 | 0 | -0.887193 | -0.512221 | -1.033380 |

Compound **4: EtO<sup>-</sup>**  
Symmetry  $C_s$   
energy  $E_h = -154.4932382$  au  
Standard orientation

|   |   |           |           |           |
|---|---|-----------|-----------|-----------|
| 8 | 0 | 1.283141  | 0.182701  | 0.000000  |
| 6 | 0 | 0.000000  | 0.529780  | 0.000000  |
| 1 | 0 | -0.319422 | 1.162009  | 0.887805  |
| 1 | 0 | -0.319422 | 1.162009  | -0.887805 |
| 6 | 0 | -0.992125 | -0.673051 | 0.000000  |
| 1 | 0 | -2.041667 | -0.338697 | 0.000000  |
| 1 | 0 | -0.815935 | -1.293652 | -0.884326 |
| 1 | 0 | -0.815935 | -1.293652 | 0.884326  |

Compound **5: *i*-PrO<sup>-</sup>**  
Symmetry  $C_s$   
energy  $E_h = -193.8283326$  au  
Standard orientation

|   |   |           |          |          |
|---|---|-----------|----------|----------|
| 8 | 0 | -0.779002 | 1.197836 | 0.000000 |
| 6 | 0 | 0.211763  | 0.309037 | 0.000000 |

|   |   |           |           |           |
|---|---|-----------|-----------|-----------|
| 1 | 0 | 1.247678  | 0.777870  | 0.000000  |
| 6 | 0 | 0.211763  | -0.607462 | 1.264972  |
| 1 | 0 | 1.056888  | -1.310878 | 1.286931  |
| 1 | 0 | 0.254724  | 0.022394  | 2.156380  |
| 1 | 0 | -0.725311 | -1.174133 | 1.299150  |
| 6 | 0 | 0.211763  | -0.607462 | -1.264972 |
| 1 | 0 | 0.254724  | 0.022394  | -2.156380 |
| 1 | 0 | 1.056888  | -1.310878 | -1.286931 |
| 1 | 0 | -0.725311 | -1.174133 | -1.299150 |

Compound **6: *t*-BuO<sup>-</sup>**  
Symmetry  $C_s$   
energy  $E_h = -233.1599602$  au  
Standard orientation

|   |   |           |           |           |
|---|---|-----------|-----------|-----------|
| 8 | 0 | -0.526876 | 1.388220  | 0.000000  |
| 6 | 0 | -0.052669 | 0.138394  | 0.000000  |
| 6 | 0 | 1.515499  | 0.111495  | 0.000000  |
| 1 | 0 | 1.945881  | -0.899894 | 0.000000  |
| 1 | 0 | 1.873384  | 0.646704  | 0.882969  |
| 1 | 0 | 1.873384  | 0.646704  | -0.882969 |
| 6 | 0 | -0.526876 | -0.664000 | -1.261469 |
| 1 | 0 | -1.619446 | -0.680132 | -1.274613 |
| 1 | 0 | -0.156890 | -1.698389 | -1.299135 |
| 1 | 0 | -0.189720 | -0.136782 | -2.157332 |
| 6 | 0 | -0.526876 | -0.664000 | 1.261469  |
| 1 | 0 | -0.156890 | -1.698389 | 1.299135  |
| 1 | 0 | -1.619446 | -0.680132 | 1.274613  |
| 1 | 0 | -0.189720 | -0.136782 | 2.157332  |

Compound **7: H<sub>2</sub>O**  
Symmetry  $C_{2v}$   
energy  $E_h = -76.4645116$  au  
Standard orientation

|   |   |          |           |           |
|---|---|----------|-----------|-----------|
| 8 | 0 | 0.000000 | 0.000000  | 0.116966  |
| 1 | 0 | 0.000000 | 0.762733  | -0.467862 |
| 1 | 0 | 0.000000 | -0.762733 | -0.467862 |

Compound **8: MeOH**  
Symmetry  $C_s$   
energy  $E_h = -115.7743176$  au  
Standard orientation

|   |   |           |           |           |
|---|---|-----------|-----------|-----------|
| 8 | 0 | -0.046432 | -0.756172 | 0.000000  |
| 1 | 0 | 0.860988  | -1.069539 | 0.000000  |
| 6 | 0 | -0.046432 | 0.664807  | 0.000000  |
| 1 | 0 | -1.087885 | 0.979086  | 0.000000  |
| 1 | 0 | 0.438471  | 1.075495  | 0.890506  |
| 1 | 0 | 0.438471  | 1.075495  | -0.890506 |

Compound **9: EtOH**  
Symmetry  $C_s$   
energy  $E_h = -155.1069850$  au  
Standard orientation

|   |   |           |           |           |
|---|---|-----------|-----------|-----------|
| 8 | 0 | 1.199571  | -0.220624 | 0.000000  |
| 1 | 0 | 1.956528  | 0.370387  | 0.000000  |
| 6 | 0 | 0.000000  | 0.553198  | 0.000000  |
| 1 | 0 | -0.036611 | 1.198023  | 0.885108  |
| 1 | 0 | -0.036611 | 1.198023  | -0.885108 |
| 6 | 0 | -1.176707 | -0.400020 | 0.000000  |
| 1 | 0 | -2.115206 | 0.155466  | 0.000000  |
| 1 | 0 | -1.152212 | -1.037988 | -0.883334 |
| 1 | 0 | -1.152212 | -1.037988 | 0.883334  |

Compound **10: *i*-PrOH**  
Symmetry  $C_1$   
energy  $E_h = -194.4391735$  au  
Standard orientation

|   |   |           |           |           |
|---|---|-----------|-----------|-----------|
| 8 | 0 | 0.052530  | 1.370704  | -0.162761 |
| 1 | 0 | 0.886106  | 1.774640  | 0.093759  |
| 6 | 0 | -0.001740 | 0.038904  | 0.361903  |
| 1 | 0 | 0.006374  | 0.088076  | 1.458292  |
| 6 | 0 | -1.328476 | -0.547372 | -0.089136 |
| 1 | 0 | -1.366229 | -0.603917 | -1.177868 |
| 1 | 0 | -1.462727 | -1.550533 | 0.316038  |
| 1 | 0 | -2.154529 | 0.076636  | 0.249535  |
| 6 | 0 | 1.193395  | -0.785970 | -0.102691 |
| 1 | 0 | 2.132425  | -0.333451 | 0.223289  |
| 1 | 0 | 1.152235  | -1.795299 | 0.309800  |
| 1 | 0 | 1.207026  | -0.855157 | -1.191208 |

Compound **11: *t*-BuOH**  
Symmetry  $C_s$   
energy  $E_h = -233.7696130$  au  
Standard orientation

|   |   |           |           |           |
|---|---|-----------|-----------|-----------|
| 8 | 0 | 0.486018  | 1.368146  | 0.000000  |
| 1 | 0 | 1.447835  | 1.351257  | 0.000000  |
| 6 | 0 | -0.001335 | 0.013541  | 0.000000  |
| 6 | 0 | 0.486018  | -0.705446 | 1.261292  |
| 1 | 0 | 0.098006  | -1.723809 | 1.310195  |
| 1 | 0 | 1.576739  | -0.764086 | 1.276189  |
| 1 | 0 | 0.161121  | -0.167461 | 2.151414  |
| 6 | 0 | 0.486018  | -0.705446 | -1.261292 |
| 1 | 0 | 0.098006  | -1.723809 | -1.310195 |
| 1 | 0 | 0.161121  | -0.167461 | -2.151414 |
| 1 | 0 | 1.576739  | -0.764086 | -1.276189 |

|   |   |           |           |           |
|---|---|-----------|-----------|-----------|
| 6 | 0 | -1.521713 | 0.143320  | 0.000000  |
| 1 | 0 | -1.993801 | -0.839102 | 0.000000  |
| 1 | 0 | -1.853912 | 0.688784  | 0.882843  |
| 1 | 0 | -1.853912 | 0.688784  | -0.882843 |

Compound **12: *n*-PrOH**  
Symmetry  $C_s$   
energy  $E_h = -194.4339571$  au

Standard orientation

|   |   |           |           |           |
|---|---|-----------|-----------|-----------|
| 8 | 0 | -1.472735 | -1.140396 | 0.000000  |
| 1 | 0 | -1.544507 | -2.097938 | 0.000000  |
| 6 | 0 | -0.094374 | -0.773020 | 0.000000  |
| 1 | 0 | 0.410194  | -1.177714 | 0.885536  |
| 1 | 0 | 0.410194  | -1.177714 | -0.885536 |
| 6 | 0 | 0.000000  | 0.741864  | 0.000000  |
| 1 | 0 | -0.529661 | 1.122253  | -0.875906 |
| 1 | 0 | -0.529661 | 1.122253  | 0.875906  |
| 6 | 0 | 1.445483  | 1.236592  | 0.000000  |
| 1 | 0 | 1.485476  | 2.325672  | 0.000000  |
| 1 | 0 | 1.986596  | 0.886870  | 0.881330  |
| 1 | 0 | 1.986596  | 0.886870  | -0.881330 |

Compound **13: *n*-BuOH**  
Symmetry  $C_s$   
energy  $E_h = -233.7610000$  au

Standard orientation

|   |   |           |           |           |
|---|---|-----------|-----------|-----------|
| 8 | 0 | -2.369922 | 0.650027  | 0.000000  |
| 1 | 0 | -3.230208 | 0.223416  | 0.000000  |
| 6 | 0 | -1.351247 | -0.349361 | 0.000000  |
| 1 | 0 | -1.444029 | -0.989255 | 0.885519  |
| 1 | 0 | -1.444029 | -0.989255 | -0.885519 |
| 6 | 0 | 0.000000  | 0.341935  | 0.000000  |
| 1 | 0 | 0.058038  | 0.992537  | -0.876439 |
| 1 | 0 | 0.058038  | 0.992537  | 0.876439  |
| 6 | 0 | 1.171611  | -0.640385 | 0.000000  |
| 1 | 0 | 1.099355  | -1.293560 | 0.874612  |
| 1 | 0 | 1.099355  | -1.293560 | -0.874612 |
| 6 | 0 | 2.532109  | 0.055462  | 0.000000  |
| 1 | 0 | 3.348251  | -0.667889 | 0.000000  |
| 1 | 0 | 2.649882  | 0.689457  | -0.880648 |
| 1 | 0 | 2.649882  | 0.689457  | 0.880648  |

Compound **14: Me<sub>2</sub>O**  
Symmetry  $C_{2v}$   
energy  $E_h = -155.0899217$  au

Standard orientation

|   |   |          |          |          |
|---|---|----------|----------|----------|
| 8 | 0 | 0.000000 | 0.000000 | 0.584953 |
|---|---|----------|----------|----------|

|   |   |           |           |           |
|---|---|-----------|-----------|-----------|
| 6 | 0 | 0.000000  | 1.174583  | -0.194140 |
| 1 | 0 | 0.000000  | 2.019927  | 0.490609  |
| 1 | 0 | 0.890029  | 1.232286  | -0.832789 |
| 1 | 0 | -0.890029 | 1.232286  | -0.832789 |
| 6 | 0 | 0.000000  | -1.174583 | -0.194140 |
| 1 | 0 | 0.890029  | -1.232286 | -0.832789 |
| 1 | 0 | 0.000000  | -2.019927 | 0.490609  |
| 1 | 0 | -0.890029 | -1.232286 | -0.832789 |

Compound **15: EtOMe**  
Symmetry  $C_s$   
energy  $E_h = -194.4224628$  au  
Standard orientation

|   |   |           |           |           |
|---|---|-----------|-----------|-----------|
| 8 | 0 | -0.013326 | -0.709585 | 0.000000  |
| 6 | 0 | -1.313401 | -1.252848 | 0.000000  |
| 1 | 0 | -1.214437 | -2.336309 | 0.000000  |
| 1 | 0 | -1.877323 | -0.946764 | 0.889759  |
| 1 | 0 | -1.877323 | -0.946764 | -0.889759 |
| 6 | 0 | 0.000000  | 0.706265  | 0.000000  |
| 1 | 0 | -0.532428 | 1.082090  | 0.884561  |
| 1 | 0 | -0.532428 | 1.082090  | -0.884561 |
| 6 | 0 | 1.437271  | 1.184095  | 0.000000  |
| 1 | 0 | 1.962293  | 0.821609  | -0.883391 |
| 1 | 0 | 1.472742  | 2.274051  | 0.000000  |
| 1 | 0 | 1.962293  | 0.821609  | 0.883391  |

Compound **16: *i*-PrOMe**  
Symmetry  $C_1$   
energy  $E_h = -233.7520523$  au  
Standard orientation

|   |   |           |           |           |
|---|---|-----------|-----------|-----------|
| 8 | 0 | -0.707122 | -0.561873 | -0.363852 |
| 6 | 0 | -1.962524 | -0.108641 | 0.090631  |
| 1 | 0 | -2.129166 | 0.951887  | -0.124108 |
| 1 | 0 | -2.719754 | -0.689471 | -0.432343 |
| 1 | 0 | -2.077739 | -0.268106 | 1.169808  |
| 6 | 0 | 0.420758  | -0.006993 | 0.311746  |
| 1 | 0 | 0.225312  | -0.042576 | 1.393043  |
| 6 | 0 | 1.603336  | -0.907555 | -0.007811 |
| 1 | 0 | 1.796083  | -0.909186 | -1.081421 |
| 1 | 0 | 2.501033  | -0.558912 | 0.503274  |
| 1 | 0 | 1.399709  | -1.930920 | 0.304330  |
| 6 | 0 | 0.675531  | 1.442528  | -0.097666 |
| 1 | 0 | 0.866601  | 1.502214  | -1.170040 |
| 1 | 0 | -0.171978 | 2.086062  | 0.136558  |
| 1 | 0 | 1.544270  | 1.837964  | 0.430319  |

Compound **17: *t*-BuOMe**

Symmetry  $C_s$   
energy  $E_h = -273.0790274$  au  
Standard orientation

|   |   |           |           |           |
|---|---|-----------|-----------|-----------|
| 8 | 0 | 0.441581  | -1.033499 | 0.000000  |
| 6 | 0 | -0.633856 | -1.946981 | 0.000000  |
| 1 | 0 | -0.189822 | -2.940725 | 0.000000  |
| 1 | 0 | -1.264786 | -1.853294 | 0.889245  |
| 1 | 0 | -1.264786 | -1.853294 | -0.889245 |
| 6 | 0 | 0.141161  | 0.376056  | 0.000000  |
| 6 | 0 | -0.633856 | 0.771595  | -1.262442 |
| 1 | 0 | -1.636154 | 0.343805  | -1.277241 |
| 1 | 0 | -0.741048 | 1.855383  | -1.313001 |
| 1 | 0 | -0.101787 | 0.437928  | -2.153499 |
| 6 | 0 | -0.633856 | 0.771595  | 1.262442  |
| 1 | 0 | -0.101787 | 0.437928  | 2.153499  |
| 1 | 0 | -0.741048 | 1.855383  | 1.313001  |
| 1 | 0 | -1.636154 | 0.343805  | 1.277241  |
| 6 | 0 | 1.519225  | 1.036303  | 0.000000  |
| 1 | 0 | 1.427729  | 2.122460  | 0.000000  |
| 1 | 0 | 2.082047  | 0.733604  | 0.882554  |
| 1 | 0 | 2.082047  | 0.733604  | -0.882554 |

Compound **18**: *n*-PrOMe  
Symmetry  $C_s$   
energy  $E_h = -233.7493305$  au  
Standard orientation

|   |   |           |           |           |
|---|---|-----------|-----------|-----------|
| 8 | 0 | -1.268169 | -0.296782 | 0.000000  |
| 6 | 0 | -2.340439 | 0.617381  | 0.000000  |
| 1 | 0 | -3.262247 | 0.039445  | 0.000000  |
| 1 | 0 | -2.322106 | 1.258792  | 0.889715  |
| 1 | 0 | -2.322106 | 1.258792  | -0.889715 |
| 6 | 0 | 0.000000  | 0.330438  | 0.000000  |
| 1 | 0 | 0.097394  | 0.975992  | 0.885028  |
| 1 | 0 | 0.097394  | 0.975992  | -0.885028 |
| 6 | 0 | 1.084938  | -0.731404 | 0.000000  |
| 1 | 0 | 0.948184  | -1.368701 | -0.875927 |
| 1 | 0 | 0.948184  | -1.368701 | 0.875927  |
| 6 | 0 | 2.488918  | -0.128785 | 0.000000  |
| 1 | 0 | 2.655707  | 0.493464  | 0.881300  |
| 1 | 0 | 3.248739  | -0.910066 | 0.000000  |
| 1 | 0 | 2.655707  | 0.493464  | -0.881300 |

Compound **19**: *n*-BuOMe  
Symmetry  $C_s$   
energy  $E_h = -273.0763728$  au  
Standard orientation

|   |   |          |           |          |
|---|---|----------|-----------|----------|
| 8 | 0 | 1.407588 | -1.225473 | 0.000000 |
| 6 | 0 | 1.557704 | -2.626451 | 0.000000 |



|   |   |           |           |           |
|---|---|-----------|-----------|-----------|
| 1 | 0 | 2.624521  | -2.840286 | 0.000000  |
| 1 | 0 | 1.103722  | -3.079928 | 0.889749  |
| 1 | 0 | 1.103722  | -3.079928 | -0.889749 |
| 6 | 0 | 0.055207  | -0.808302 | 0.000000  |
| 1 | 0 | -0.458874 | -1.210170 | 0.884950  |
| 1 | 0 | -0.458874 | -1.210170 | -0.884950 |
| 6 | 0 | 0.000000  | 0.708738  | 0.000000  |
| 1 | 0 | 0.538279  | 1.078100  | -0.876436 |
| 1 | 0 | 0.538279  | 1.078100  | 0.876436  |
| 6 | 0 | -1.430246 | 1.250736  | 0.000000  |
| 1 | 0 | -1.964542 | 0.868329  | 0.874580  |
| 1 | 0 | -1.964542 | 0.868329  | -0.874580 |
| 6 | 0 | -1.486850 | 2.777754  | 0.000000  |
| 1 | 0 | -2.516310 | 3.137547  | 0.000000  |
| 1 | 0 | -0.990489 | 3.189504  | 0.880601  |
| 1 | 0 | -0.990489 | 3.189504  | -0.880601 |

Compound **20**: Et<sub>2</sub>O  
Symmetry C<sub>2v</sub>  
energy E<sub>h</sub> = -233.7548183 au  
Standard orientation

|   |   |           |           |           |
|---|---|-----------|-----------|-----------|
| 8 | 0 | 0.000000  | 0.000000  | 0.257696  |
| 6 | 0 | 0.000000  | 1.184327  | -0.517210 |
| 1 | 0 | 0.884346  | 1.202715  | -1.168853 |
| 1 | 0 | -0.884346 | 1.202715  | -1.168853 |
| 6 | 0 | 0.000000  | 2.380714  | 0.412255  |
| 1 | 0 | 0.883336  | 2.371435  | 1.050344  |
| 1 | 0 | 0.000000  | 3.306575  | -0.164040 |
| 1 | 0 | -0.883336 | 2.371435  | 1.050344  |
| 6 | 0 | 0.000000  | -1.184327 | -0.517210 |
| 1 | 0 | 0.884346  | -1.202715 | -1.168853 |
| 1 | 0 | -0.884346 | -1.202715 | -1.168853 |
| 6 | 0 | 0.000000  | -2.380714 | 0.412255  |
| 1 | 0 | -0.883336 | -2.371435 | 1.050344  |
| 1 | 0 | 0.000000  | -3.306575 | -0.164040 |
| 1 | 0 | 0.883336  | -2.371435 | 1.050344  |

Compound **21**: *i*-Pr<sub>2</sub>O  
Symmetry C<sub>2</sub>  
energy E<sub>h</sub> = -312.4138217 au  
Standard orientation

|   |   |           |          |           |
|---|---|-----------|----------|-----------|
| 8 | 0 | 0.000000  | 0.000000 | 0.528322  |
| 6 | 0 | 0.326453  | 1.168936 | -0.224643 |
| 1 | 0 | -0.303711 | 1.207389 | -1.121468 |
| 6 | 0 | 0.000000  | 2.368551 | 0.651896  |
| 1 | 0 | 0.583000  | 2.329958 | 1.573019  |
| 1 | 0 | 0.234209  | 3.299726 | 0.134901  |
| 1 | 0 | -1.056302 | 2.373405 | 0.917682  |

|   |   |           |           |           |
|---|---|-----------|-----------|-----------|
| 6 | 0 | 1.793300  | 1.149951  | -0.651334 |
| 1 | 0 | 2.023172  | 0.268283  | -1.249819 |
| 1 | 0 | 2.031751  | 2.030169  | -1.250561 |
| 1 | 0 | 2.439357  | 1.143670  | 0.227442  |
| 6 | 0 | -0.326453 | -1.168936 | -0.224643 |
| 1 | 0 | 0.303711  | -1.207389 | -1.121468 |
| 6 | 0 | 0.000000  | -2.368551 | 0.651896  |
| 1 | 0 | -0.234209 | -3.299726 | 0.134901  |
| 1 | 0 | 1.056302  | -2.373405 | 0.917682  |
| 1 | 0 | -0.583000 | -2.329958 | 1.573019  |
| 6 | 0 | -1.793300 | -1.149951 | -0.651334 |
| 1 | 0 | -2.031751 | -2.030169 | -1.250561 |
| 1 | 0 | -2.439357 | -1.143670 | 0.227442  |
| 1 | 0 | -2.023172 | -0.268283 | -1.249819 |

Compound **22**: *t*-Bu<sub>2</sub>O  
Symmetry C<sub>2</sub>  
energy E<sub>h</sub> = -391.0591996 au  
Standard orientation

|   |   |           |           |           |
|---|---|-----------|-----------|-----------|
| 8 | 0 | 0.000000  | 0.000000  | 0.688010  |
| 6 | 0 | 0.000000  | 1.296409  | 0.055361  |
| 6 | 0 | -0.408591 | 2.225672  | 1.204409  |
| 1 | 0 | 0.290558  | 2.125193  | 2.033824  |
| 1 | 0 | -0.415128 | 3.265881  | 0.877830  |
| 1 | 0 | -1.403142 | 1.965331  | 1.564955  |
| 6 | 0 | 1.409911  | 1.682863  | -0.420198 |
| 1 | 0 | 1.718712  | 1.125747  | -1.301294 |
| 1 | 0 | 1.440518  | 2.743813  | -0.672921 |
| 1 | 0 | 2.132071  | 1.500920  | 0.375271  |
| 6 | 0 | -1.010292 | 1.441093  | -1.089155 |
| 1 | 0 | -2.014958 | 1.183206  | -0.757551 |
| 1 | 0 | -1.022752 | 2.478273  | -1.426469 |
| 1 | 0 | -0.756260 | 0.822754  | -1.948189 |
| 6 | 0 | 0.000000  | -1.296409 | 0.055361  |
| 6 | 0 | 1.010292  | -1.441093 | -1.089155 |
| 1 | 0 | 0.756260  | -0.822754 | -1.948189 |
| 1 | 0 | 2.014958  | -1.183206 | -0.757551 |
| 1 | 0 | 1.022752  | -2.478273 | -1.426469 |
| 6 | 0 | 0.408591  | -2.225672 | 1.204409  |
| 1 | 0 | -0.290558 | -2.125193 | 2.033824  |
| 1 | 0 | 0.415128  | -3.265881 | 0.877830  |
| 1 | 0 | 1.403142  | -1.965331 | 1.564955  |
| 6 | 0 | -1.409911 | -1.682863 | -0.420198 |
| 1 | 0 | -2.132071 | -1.500920 | 0.375271  |
| 1 | 0 | -1.718712 | -1.125747 | -1.301294 |
| 1 | 0 | -1.440518 | -2.743813 | -0.672921 |

Compound **23**: *n*-Pr<sub>2</sub>O

Symmetry  $C_{2v}$   
energy  $E_h = -312.4085735$  au  
Standard orientation

|   |   |           |           |           |
|---|---|-----------|-----------|-----------|
| 8 | 0 | 0.000000  | 0.000000  | 0.382795  |
| 6 | 0 | 0.000000  | 1.183942  | -0.390735 |
| 1 | 0 | 0.884778  | 1.205593  | -1.043307 |
| 1 | 0 | -0.884778 | 1.205593  | -1.043307 |
| 6 | 0 | 0.000000  | 2.388173  | 0.534454  |
| 1 | 0 | 0.875861  | 2.328776  | 1.183697  |
| 1 | 0 | -0.875861 | 2.328776  | 1.183697  |
| 6 | 0 | 0.000000  | 3.710182  | -0.231494 |
| 1 | 0 | 0.000000  | 4.558092  | 0.453257  |
| 1 | 0 | 0.881269  | 3.801351  | -0.869285 |
| 1 | 0 | -0.881269 | 3.801351  | -0.869285 |
| 6 | 0 | 0.000000  | -1.183942 | -0.390735 |
| 1 | 0 | 0.884778  | -1.205593 | -1.043307 |
| 1 | 0 | -0.884778 | -1.205593 | -1.043307 |
| 6 | 0 | 0.000000  | -2.388173 | 0.534454  |
| 1 | 0 | -0.875861 | -2.328776 | 1.183697  |
| 1 | 0 | 0.875861  | -2.328776 | 1.183697  |
| 6 | 0 | 0.000000  | -3.710182 | -0.231494 |
| 1 | 0 | 0.881269  | -3.801351 | -0.869285 |
| 1 | 0 | 0.000000  | -4.558092 | 0.453257  |
| 1 | 0 | -0.881269 | -3.801351 | -0.869285 |

Compound **24**: *n*-Bu<sub>2</sub>O  
Symmetry  $C_{2v}$   
energy  $E_h = -391.0626456$  au  
Standard orientation

|   |   |           |           |           |
|---|---|-----------|-----------|-----------|
| 8 | 0 | 0.000000  | 0.000000  | 0.202883  |
| 6 | 0 | 0.000000  | 1.183918  | -0.571524 |
| 1 | 0 | 0.884677  | 1.204019  | -1.224035 |
| 1 | 0 | -0.884677 | 1.204019  | -1.224035 |
| 6 | 0 | 0.000000  | 2.388071  | 0.353657  |
| 1 | 0 | 0.876393  | 2.329857  | 1.004008  |
| 1 | 0 | -0.876393 | 2.329857  | 1.004008  |
| 6 | 0 | 0.000000  | 3.717271  | -0.402583 |
| 1 | 0 | 0.874520  | 3.762942  | -1.058169 |
| 1 | 0 | -0.874520 | 3.762942  | -1.058169 |
| 6 | 0 | 0.000000  | 4.930249  | 0.526829  |
| 1 | 0 | 0.000000  | 5.863692  | -0.037086 |
| 1 | 0 | -0.880595 | 4.931425  | 1.171836  |
| 1 | 0 | 0.880595  | 4.931425  | 1.171836  |
| 6 | 0 | 0.000000  | -1.183918 | -0.571524 |
| 1 | 0 | 0.884677  | -1.204019 | -1.224035 |
| 1 | 0 | -0.884677 | -1.204019 | -1.224035 |
| 6 | 0 | 0.000000  | -2.388071 | 0.353657  |
| 1 | 0 | -0.876393 | -2.329857 | 1.004008  |
| 1 | 0 | 0.876393  | -2.329857 | 1.004008  |

|   |   |           |           |           |
|---|---|-----------|-----------|-----------|
| 6 | 0 | 0.000000  | -3.717271 | -0.402583 |
| 1 | 0 | 0.874520  | -3.762942 | -1.058169 |
| 1 | 0 | -0.874520 | -3.762942 | -1.058169 |
| 6 | 0 | 0.000000  | -4.930249 | 0.526829  |
| 1 | 0 | -0.880595 | -4.931425 | 1.171836  |
| 1 | 0 | 0.000000  | -5.863692 | -0.037086 |
| 1 | 0 | 0.880595  | -4.931425 | 1.171836  |

Compound **25: H<sub>3</sub>O<sup>+</sup>**  
Symmetry  $C_{3v}$   
energy  $E_h = -76.7368005$  au  
Standard orientation

|   |   |           |           |           |
|---|---|-----------|-----------|-----------|
| 8 | 0 | 0.000000  | 0.000000  | 0.073711  |
| 1 | 0 | 0.000000  | 0.941788  | -0.196563 |
| 1 | 0 | 0.815612  | -0.470894 | -0.196563 |
| 1 | 0 | -0.815612 | -0.470894 | -0.196563 |

Compound **26: MeH<sub>2</sub>O<sup>+</sup>**  
Symmetry  $C_s$   
energy  $E_h = -116.0719713$  au  
Standard orientation

|   |   |           |           |           |
|---|---|-----------|-----------|-----------|
| 8 | 0 | 0.037502  | -0.723242 | 0.000000  |
| 1 | 0 | -0.346267 | -1.128173 | 0.799043  |
| 1 | 0 | -0.346267 | -1.128173 | -0.799043 |
| 6 | 0 | 0.037502  | 0.795940  | 0.000000  |
| 1 | 0 | 0.580072  | 1.066423  | -0.897721 |
| 1 | 0 | -0.992639 | 1.133798  | 0.000000  |
| 1 | 0 | 0.580072  | 1.066423  | 0.897721  |

Compound **27: EtH<sub>2</sub>O<sup>+</sup>**  
Symmetry  $C_1$   
energy  $E_h = -155.4143170$  au  
Standard orientation

|   |   |           |           |           |
|---|---|-----------|-----------|-----------|
| 8 | 0 | 1.195796  | -0.279004 | -0.090345 |
| 1 | 0 | 2.039250  | 0.204746  | -0.036005 |
| 1 | 0 | 1.206960  | -1.032973 | 0.526161  |
| 6 | 0 | -0.079117 | 0.620156  | 0.050042  |
| 1 | 0 | 0.047782  | 1.137995  | 0.996016  |
| 1 | 0 | 0.038008  | 1.287803  | -0.797137 |
| 6 | 0 | -1.271880 | -0.276838 | -0.025195 |
| 1 | 0 | -2.154449 | 0.362851  | 0.045406  |
| 1 | 0 | -1.320436 | -0.812216 | -0.971082 |
| 1 | 0 | -1.317503 | -0.976081 | 0.810318  |

Compound **28: Me<sub>3</sub>O<sup>+</sup>**  
Symmetry  $C_{3v}$

energy  $E_h = -194.7294900$  au

Standard orientation

|   |   |           |           |           |
|---|---|-----------|-----------|-----------|
| 8 | 0 | 0.000000  | 0.000000  | 0.296109  |
| 6 | 0 | 0.000000  | 1.434246  | -0.065850 |
| 1 | 0 | -0.893098 | 1.859177  | 0.377617  |
| 1 | 0 | 0.893098  | 1.859177  | 0.377617  |
| 1 | 0 | 0.000000  | 1.524257  | -1.149756 |
| 6 | 0 | 1.242093  | -0.717123 | -0.065850 |
| 1 | 0 | 1.163545  | -1.703034 | 0.377617  |
| 1 | 0 | 1.320045  | -0.762128 | -1.149756 |
| 1 | 0 | 2.056643  | -0.156143 | 0.377617  |
| 6 | 0 | -1.242093 | -0.717123 | -0.065850 |
| 1 | 0 | -1.320045 | -0.762128 | -1.149756 |
| 1 | 0 | -1.163545 | -1.703034 | 0.377617  |
| 1 | 0 | -2.056643 | -0.156143 | 0.377617  |

Compound **29**: Et<sub>3</sub>O<sup>+</sup>

Symmetry  $C_3$

energy  $E_h = -312.7361442$  au

Standard orientation

|   |   |           |           |           |
|---|---|-----------|-----------|-----------|
| 8 | 0 | 0.000000  | 0.000000  | 0.143044  |
| 6 | 0 | -1.390071 | -0.451164 | 0.503750  |
| 1 | 0 | -1.323216 | -0.861699 | 1.509957  |
| 1 | 0 | -1.971682 | 0.463877  | 0.524379  |
| 6 | 0 | 1.085755  | -0.978255 | 0.503750  |
| 1 | 0 | 1.407861  | -0.715089 | 1.509957  |
| 1 | 0 | 0.584112  | -1.939465 | 0.524379  |
| 6 | 0 | 0.304316  | 1.429419  | 0.503750  |
| 1 | 0 | -0.084645 | 1.576788  | 1.509957  |
| 1 | 0 | 1.387570  | 1.475588  | 0.524379  |
| 6 | 0 | -0.278931 | 2.364674  | -0.521190 |
| 1 | 0 | 0.000000  | 3.380890  | -0.239439 |
| 1 | 0 | 0.122711  | 2.165417  | -1.512563 |
| 1 | 0 | -1.365994 | 2.326394  | -0.559143 |
| 6 | 0 | -1.908402 | -1.423898 | -0.521190 |
| 1 | 0 | -2.927936 | -1.690445 | -0.239439 |
| 1 | 0 | -1.936662 | -0.976437 | -1.512563 |
| 1 | 0 | -1.331719 | -2.346182 | -0.559143 |
| 6 | 0 | 2.187333  | -0.940776 | -0.521190 |
| 1 | 0 | 2.927936  | -1.690445 | -0.239439 |
| 1 | 0 | 1.813950  | -1.188980 | -1.512563 |
| 1 | 0 | 2.697713  | 0.019788  | -0.559143 |

Compound **30**: OH<sup>+</sup>

Symmetry  $C_{\infty v}$

energy  $E_h = -75.1684563$  au

Standard orientation

|   |   |          |          |          |
|---|---|----------|----------|----------|
| 8 | 0 | 0.000000 | 0.000000 | 0.115339 |
|---|---|----------|----------|----------|

|   |   |          |          |           |
|---|---|----------|----------|-----------|
| 1 | 0 | 0.000000 | 0.000000 | -0.922710 |
|---|---|----------|----------|-----------|

Compound **31: H<sub>2</sub>C=CHOH**  
Symmetry  $C_s$   
energy  $E_h = -153.8762181$  au  
Standard orientation

|   |   |           |           |          |
|---|---|-----------|-----------|----------|
| 8 | 0 | -1.100609 | -0.395583 | 0.000000 |
| 1 | 0 | -1.899719 | 0.135391  | 0.000000 |
| 6 | 0 | 0.000000  | 0.413281  | 0.000000 |
| 1 | 0 | -0.201645 | 1.478872  | 0.000000 |
| 6 | 0 | 1.234430  | -0.068097 | 0.000000 |
| 1 | 0 | 1.427263  | -1.131309 | 0.000000 |
| 1 | 0 | 2.072388  | 0.610603  | 0.000000 |

Compound **32: H<sub>2</sub>C=CHOMe**  
Symmetry  $C_s$   
energy  $E_h = -193.1900544$  au  
Standard orientation

|   |   |           |           |           |
|---|---|-----------|-----------|-----------|
| 8 | 0 | 0.000000  | 0.668177  | 0.000000  |
| 6 | 0 | -1.364344 | 1.061633  | 0.000000  |
| 1 | 0 | -1.880096 | 0.696690  | 0.892055  |
| 1 | 0 | -1.376215 | 2.147957  | 0.000000  |
| 1 | 0 | -1.880096 | 0.696690  | -0.892055 |
| 6 | 0 | 0.228836  | -0.669122 | 0.000000  |
| 1 | 0 | -0.660325 | -1.293239 | 0.000000  |
| 6 | 0 | 1.450582  | -1.187764 | 0.000000  |
| 1 | 0 | 2.332007  | -0.563007 | 0.000000  |
| 1 | 0 | 1.574282  | -2.258983 | 0.000000  |

Compound **33: PhOH**  
Symmetry  $C_s$   
energy  $E_h = -307.5829283$  au  
Standard orientation

|   |   |           |           |          |
|---|---|-----------|-----------|----------|
| 8 | 0 | 0.047984  | 2.302030  | 0.000000 |
| 6 | 0 | 0.021631  | -1.851025 | 0.000000 |
| 6 | 0 | -1.183473 | -1.159574 | 0.000000 |
| 6 | 0 | -1.200396 | 0.230572  | 0.000000 |
| 6 | 0 | 0.000000  | 0.936403  | 0.000000 |
| 6 | 0 | 1.212675  | 0.251937  | 0.000000 |
| 6 | 0 | 1.215737  | -1.135690 | 0.000000 |
| 1 | 0 | 0.031424  | -2.931808 | 0.000000 |
| 1 | 0 | -2.120198 | -1.700802 | 0.000000 |
| 1 | 0 | -2.142818 | 0.765700  | 0.000000 |
| 1 | 0 | 2.134206  | 0.816857  | 0.000000 |
| 1 | 0 | 2.160836  | -1.662262 | 0.000000 |
| 1 | 0 | -0.844358 | 2.660331  | 0.000000 |

Compound **34**: H<sub>2</sub>C=O  
 Symmetry C<sub>2v</sub>  
 energy E<sub>h</sub> = -114.5499452 au  
 Standard orientation

|   |   |          |           |           |
|---|---|----------|-----------|-----------|
| 8 | 0 | 0.000000 | 0.000000  | 0.672428  |
| 6 | 0 | 0.000000 | 0.000000  | -0.526024 |
| 1 | 0 | 0.000000 | 0.938212  | -1.111639 |
| 1 | 0 | 0.000000 | -0.938212 | -1.111639 |

Compound **35**: H(HO)C=O\*, **36**: H(HO\*)C=O  
 Symmetry C<sub>s</sub>  
 energy E<sub>h</sub> = -189.8416527 au  
 Standard orientation

|   |   |           |           |          |
|---|---|-----------|-----------|----------|
| 8 | 0 | 1.157012  | 0.116930  | 0.000000 |
| 6 | 0 | 0.000000  | 0.420408  | 0.000000 |
| 1 | 0 | -0.382893 | 1.447570  | 0.000000 |
| 8 | 0 | -1.026765 | -0.445362 | 0.000000 |
| 1 | 0 | -0.659085 | -1.342561 | 0.000000 |

Compound **18**<sub>gauche</sub>: *n*-PrOMe  
 Symmetry C<sub>1</sub>  
 energy E<sub>h</sub> = -233.7493287 au  
 Standard orientation

|   |   |           |           |           |
|---|---|-----------|-----------|-----------|
| 8 | 0 | 0.899488  | -0.291521 | -0.354237 |
| 6 | 0 | 2.243423  | -0.272821 | 0.067292  |
| 1 | 0 | 2.763865  | -1.067312 | -0.463575 |
| 1 | 0 | 2.724440  | 0.685309  | -0.165329 |
| 1 | 0 | 2.328841  | -0.450031 | 1.146445  |
| 6 | 0 | 0.105472  | 0.704008  | 0.265146  |
| 1 | 0 | 0.515500  | 1.697908  | 0.039380  |
| 1 | 0 | 0.136182  | 0.576044  | 1.357292  |
| 6 | 0 | -1.323808 | 0.597678  | -0.238369 |
| 1 | 0 | -1.884318 | 1.441967  | 0.171420  |
| 1 | 0 | -1.318356 | 0.721522  | -1.323740 |
| 6 | 0 | -2.009442 | -0.715639 | 0.135094  |
| 1 | 0 | -3.032078 | -0.743779 | -0.242352 |
| 1 | 0 | -1.472157 | -1.567188 | -0.279670 |
| 1 | 0 | -2.051688 | -0.841632 | 1.219047  |

Compound **19**<sub>gauche</sub>: *n*-BuOMe  
 Symmetry C<sub>1</sub>  
 energy E<sub>h</sub> = -273.0764793 au  
 Standard orientation

|   |   |          |           |           |
|---|---|----------|-----------|-----------|
| 8 | 0 | 1.442030 | -0.355237 | -0.334214 |
| 6 | 0 | 2.800518 | -0.449007 | 0.026261  |
| 1 | 0 | 3.367241 | 0.428185  | -0.309628 |
| 1 | 0 | 2.922768 | -0.545212 | 1.112110  |
| 1 | 0 | 3.205956 | -1.336760 | -0.454824 |

|   |   |           |           |           |
|---|---|-----------|-----------|-----------|
| 6 | 0 | 0.791766  | 0.771347  | 0.226425  |
| 1 | 0 | 1.293570  | 1.690489  | -0.105628 |
| 1 | 0 | 0.867135  | 0.734736  | 1.323157  |
| 6 | 0 | -0.664988 | 0.782901  | -0.203411 |
| 1 | 0 | -0.705199 | 0.802373  | -1.295924 |
| 1 | 0 | -1.109146 | 1.720860  | 0.143540  |
| 6 | 0 | -1.479713 | -0.398924 | 0.324116  |
| 1 | 0 | -1.019936 | -1.328165 | -0.015262 |
| 1 | 0 | -1.426925 | -0.409430 | 1.417154  |
| 6 | 0 | -2.942360 | -0.354486 | -0.115057 |
| 1 | 0 | -3.500875 | -1.205497 | 0.276444  |
| 1 | 0 | -3.027427 | -0.375634 | -1.203335 |
| 1 | 0 | -3.434740 | 0.554963  | 0.235907  |

Compound **23**<sub>gauche</sub>: *n*-Pr<sub>2</sub>O  
Symmetry C<sub>2</sub>  
energy  $E_h = -312.4084607$  au  
Standard orientation

|   |   |           |           |           |
|---|---|-----------|-----------|-----------|
| 8 | 0 | 0.000000  | 0.000000  | 0.115698  |
| 6 | 0 | 0.004110  | 1.184394  | 0.889992  |
| 1 | 0 | -0.878534 | 1.202335  | 1.546238  |
| 1 | 0 | 0.892512  | 1.202532  | 1.535873  |
| 6 | 0 | 0.000000  | 2.393647  | -0.030139 |
| 1 | 0 | 0.112049  | 3.285376  | 0.592154  |
| 1 | 0 | 0.883779  | 2.344958  | -0.670528 |
| 6 | 0 | -1.260431 | 2.509403  | -0.885942 |
| 1 | 0 | -1.221491 | 3.394117  | -1.522291 |
| 1 | 0 | -1.377922 | 1.636779  | -1.526773 |
| 1 | 0 | -2.152484 | 2.588528  | -0.260925 |
| 6 | 0 | -0.004110 | -1.184394 | 0.889992  |
| 1 | 0 | 0.878534  | -1.202335 | 1.546238  |
| 1 | 0 | -0.892512 | -1.202532 | 1.535873  |
| 6 | 0 | 0.000000  | -2.393647 | -0.030139 |
| 1 | 0 | -0.112049 | -3.285376 | 0.592154  |
| 1 | 0 | -0.883779 | -2.344958 | -0.670528 |
| 6 | 0 | 1.260431  | -2.509403 | -0.885942 |
| 1 | 0 | 1.221491  | -3.394117 | -1.522291 |
| 1 | 0 | 1.377922  | -1.636779 | -1.526773 |
| 1 | 0 | 2.152484  | -2.588528 | -0.260925 |

Compound **24**<sub>gauche</sub>: *n*-Bu<sub>2</sub>O  
Symmetry C<sub>2</sub>  
energy  $E_h = -391.0627692$  au  
Standard orientation

|   |   |           |          |          |
|---|---|-----------|----------|----------|
| 8 | 0 | 0.000000  | 0.000000 | 0.523702 |
| 6 | 0 | -0.000314 | 1.184073 | 1.299203 |
| 1 | 0 | -0.886154 | 1.201441 | 1.948577 |
| 1 | 0 | 0.884242  | 1.200000 | 1.952763 |



|   |   |           |           |           |
|---|---|-----------|-----------|-----------|
| 6 | 0 | 0.000000  | 2.395058  | 0.381983  |
| 1 | 0 | -0.880863 | 2.343800  | -0.263911 |
| 1 | 0 | -0.119869 | 3.286806  | 1.004819  |
| 6 | 0 | 1.261232  | 2.531044  | -0.472603 |
| 1 | 0 | 1.380937  | 1.630951  | -1.077327 |
| 1 | 0 | 2.134419  | 2.579016  | 0.185320  |
| 6 | 0 | 1.235587  | 3.762066  | -1.376967 |
| 1 | 0 | 1.142862  | 4.681157  | -0.794422 |
| 1 | 0 | 2.146828  | 3.837566  | -1.971490 |
| 1 | 0 | 0.391781  | 3.724576  | -2.068830 |
| 6 | 0 | 0.000314  | -1.184073 | 1.299203  |
| 1 | 0 | -0.884242 | -1.200000 | 1.952763  |
| 1 | 0 | 0.886154  | -1.201441 | 1.948577  |
| 6 | 0 | 0.000000  | -2.395058 | 0.381983  |
| 1 | 0 | 0.119869  | -3.286806 | 1.004819  |
| 1 | 0 | 0.880863  | -2.343800 | -0.263911 |
| 6 | 0 | -1.261232 | -2.531044 | -0.472603 |
| 1 | 0 | -1.380937 | -1.630951 | -1.077327 |
| 1 | 0 | -2.134419 | -2.579016 | 0.185320  |
| 6 | 0 | -1.235587 | -3.762066 | -1.376967 |
| 1 | 0 | -1.142862 | -4.681157 | -0.794422 |
| 1 | 0 | -2.146828 | -3.837566 | -1.971490 |
| 1 | 0 | -0.391781 | -3.724576 | -2.068830 |

**Procedure to draw the selected contributions from each  $\psi_i$  to  $\sigma^d$  and  $\sigma^p$  and each  $\psi_i \rightarrow \psi_a$  transition, using molecular orbitals**

(The procedure, analyzing the output of Gaussian program, with the utility program, is explained, exemplified by H<sub>2</sub>O: The output format below is the same as that from the program.)

**Output**

SP: B3LYP/6-311++G(3df,3pd)

Number of Basis Functions = 83  
Number of Orbitals = 83  
Number of Atoms = 3  
Multiplicity = 1  
Number of Electrons = 10

-----  
Diamagnetic MO contribution  
-----

|     |           |           |           |
|-----|-----------|-----------|-----------|
| 1   | 270.61732 | 270.60956 | 270.61250 |
| 2   | 39.48301  | 37.69066  | 39.27237  |
| 3   | 21.13187  | 17.49616  | 17.92855  |
| 4   | 28.66156  | 30.44936  | 22.94863  |
| 5   | 22.33530  | 44.37664  | 44.94523  |
| SUM | 382.22906 | 400.62238 | 395.70728 |

-----  
Paramagnetic MO contribution  
-----

|           |            |           |            |
|-----------|------------|-----------|------------|
| OCC x OCC | 148.97707  | 77.28316  | 101.64450  |
| 1         | -0.00111   | -0.00103  | 0.00001    |
| 2         | -10.27629  | -5.57952  | 0.15029    |
| 3         | -87.09246  | -0.20783  | -63.38689  |
| 4         | -134.64642 | -36.35417 | -0.01775   |
| 5         | -0.02095   | -72.96107 | -117.66898 |
| SUM       | -83.06016  | -37.82046 | -79.27883  |

=====

## Appendix

### Procedure to draw the selected contributions from each $\psi_i$ to $\sigma^d$ and $\sigma^p$ and each $\psi_i \rightarrow \psi_a$ transition, using molecular orbitals

(The procedure, analyzing the output of Gaussian program, with the utility program, is explained, exemplified by H<sub>2</sub>O: The output format below is the same as that from the program.)

#### Output

SP: B3LYP/6-311++G(3df,3pd)

Number of Basis Functions = 83  
Number of Orbitals = 83  
Number of Atoms = 3  
Multiplicity = 1  
Number of Electrons = 10

#### Diamagnetic MO contribution

|     |           |           |           |
|-----|-----------|-----------|-----------|
| 1   | 270.61732 | 270.60956 | 270.61250 |
| 2   | 39.48301  | 37.69066  | 39.27237  |
| 3   | 21.13187  | 17.49616  | 17.92855  |
| 4   | 28.66156  | 30.44936  | 22.94863  |
| 5   | 22.33530  | 44.37664  | 44.94523  |
| SUM | 382.22906 | 400.62238 | 395.70728 |

#### Paramagnetic MO contribution

|           |           |          |           |
|-----------|-----------|----------|-----------|
| OCC-->OCC | 148.97707 | 77.28316 | 101.64450 |
| --        |           |          |           |
| 1--> 6    | 0.00000   | 0.00000  | 0.00000   |
| 1--> 7    | 0.00007   | 0.00000  | 0.00000   |
| 1--> 8    | 0.00000   | 0.00000  | 0.00000   |
| 1--> 9    | 0.00015   | 0.00000  | 0.00000   |
| 1--> 10   | 0.00000   | 0.00000  | 0.00000   |
| 1--> 11   | 0.00000   | -0.00017 | 0.00000   |
| 1--> 12   | 0.00000   | 0.00000  | 0.00000   |
| 1--> 13   | -0.00035  | 0.00000  | 0.00000   |
| 1--> 14   | 0.00000   | 0.00000  | 0.00000   |
| 1--> 15   | 0.00000   | 0.00000  | 0.00000   |
| 1--> 16   | 0.00000   | -0.00009 | 0.00000   |
| 1--> 17   | 0.00017   | 0.00000  | 0.00000   |
| 1--> 18   | 0.00000   | 0.00000  | 0.00000   |
| 1--> 19   | -0.00003  | 0.00000  | 0.00000   |
| 1--> 20   | 0.00000   | 0.00000  | 0.00000   |
| 1--> 21   | 0.00007   | 0.00000  | 0.00000   |
| 1--> 22   | 0.00000   | 0.00000  | 0.00000   |
| 1--> 23   | 0.00000   | 0.00013  | 0.00000   |
| 1--> 24   | 0.00000   | 0.00000  | 0.00000   |
| 1--> 25   | 0.00000   | 0.00000  | 0.00001   |
| 1--> 26   | -0.00013  | 0.00000  | 0.00000   |
| 1--> 27   | 0.00000   | 0.00000  | 0.00000   |
| 1--> 28   | 0.00000   | -0.00042 | 0.00000   |

|         |           |               |           |
|---------|-----------|---------------|-----------|
| 1--> 29 | 0.00000   | 0.00000       | 0.00000   |
| 1--> 30 | -0.00006  | 0.00000       | 0.00000   |
| ---     |           | -- omitted -- | ---       |
| 1--> 83 | 0.00000   | 0.00000       | 0.00000   |
| --      |           |               |           |
| 2--> 6  | 0.00000   | 0.00000       | 0.00000   |
| 2--> 7  | -0.46140  | 0.00000       | 0.00000   |
| 2--> 8  | 0.00000   | 0.00000       | 0.00000   |
| 2--> 9  | -1.54627  | 0.00000       | 0.00000   |
| 2--> 10 | 0.00000   | 0.00000       | 0.00000   |
| 2--> 11 | 0.00000   | -1.31063      | 0.00000   |
| 2--> 12 | 0.00000   | 0.00000       | 0.00000   |
| 2--> 13 | -1.56968  | 0.00000       | 0.00000   |
| 2--> 14 | 0.00000   | 0.00000       | 0.00000   |
| 2--> 15 | 0.00000   | 0.00000       | 0.04059   |
| 2--> 16 | 0.00000   | -0.46515      | 0.00000   |
| 2--> 17 | -0.73001  | 0.00000       | 0.00000   |
| 2--> 18 | 0.00000   | 0.00000       | 0.00000   |
| 2--> 19 | -0.74776  | 0.00000       | 0.00000   |
| 2--> 20 | 0.00000   | 0.00000       | 0.00000   |
| 2--> 21 | -1.20339  | 0.00000       | 0.00000   |
| 2--> 22 | 0.00000   | 0.00000       | 0.00000   |
| 2--> 23 | 0.00000   | -0.63944      | 0.00000   |
| 2--> 24 | 0.00000   | 0.00000       | 0.00000   |
| 2--> 25 | 0.00000   | 0.00000       | 0.04077   |
| 2--> 26 | -1.20559  | 0.00000       | 0.00000   |
| 2--> 27 | 0.00000   | 0.00000       | 0.00000   |
| 2--> 28 | 0.00000   | -1.90971      | 0.00000   |
| 2--> 29 | 0.00000   | 0.00000       | 0.00000   |
| 2--> 30 | -0.35428  | 0.00000       | 0.00000   |
| ---     |           | -- omitted -- | ---       |
| 2--> 83 | 0.00000   | 0.00000       | 0.00000   |
| --      |           |               |           |
| 3--> 6  | -16.10823 | 0.00000       | 0.00000   |
| 3--> 7  | 0.00000   | 0.00000       | 0.00000   |
| 3--> 8  | -28.12427 | 0.00000       | 0.00000   |
| 3--> 9  | 0.00000   | 0.00000       | 0.00000   |
| 3--> 10 | -8.79592  | 0.00000       | 0.00000   |
| 3--> 11 | 0.00000   | 0.00000       | -32.21992 |
| 3--> 12 | -0.54182  | 0.00000       | 0.00000   |
| 3--> 13 | 0.00000   | 0.00000       | 0.00000   |
| 3--> 14 | 1.23338   | 0.00000       | 0.00000   |
| 3--> 15 | 0.00000   | -0.05070      | 0.00000   |
| 3--> 16 | 0.00000   | 0.00000       | -3.05255  |
| 3--> 17 | 0.00000   | 0.00000       | 0.00000   |
| 3--> 18 | -9.64160  | 0.00000       | 0.00000   |
| 3--> 19 | 0.00000   | 0.00000       | 0.00000   |
| 3--> 20 | -3.65496  | 0.00000       | 0.00000   |
| 3--> 21 | 0.00000   | 0.00000       | 0.00000   |
| 3--> 22 | 0.29175   | 0.00000       | 0.00000   |
| 3--> 23 | 0.00000   | 0.00000       | -8.22945  |
| 3--> 24 | -13.26418 | 0.00000       | 0.00000   |
| 3--> 25 | 0.00000   | -0.11824      | 0.00000   |
| 3--> 26 | 0.00000   | 0.00000       | 0.00000   |
| 3--> 27 | 0.70959   | 0.00000       | 0.00000   |
| 3--> 28 | 0.00000   | 0.00000       | -10.50555 |
| 3--> 29 | -0.35559  | 0.00000       | 0.00000   |
| 3--> 30 | 0.00000   | 0.00000       | 0.00000   |
| ---     |           | -- omitted -- | ---       |

|         |           |               |           |
|---------|-----------|---------------|-----------|
| 3--> 83 | 0.00060   | 0.00000       | 0.00000   |
| --      |           |               |           |
| 4--> 6  | 0.00000   | 0.00000       | 0.00000   |
| 4--> 7  | -10.93409 | 0.00000       | 0.00000   |
| 4--> 8  | 0.00000   | 0.00000       | 0.00000   |
| 4--> 9  | -40.87481 | 0.00000       | 0.00000   |
| 4--> 10 | 0.00000   | 0.00000       | 0.00000   |
| 4--> 11 | 0.00000   | -21.08688     | 0.00000   |
| 4--> 12 | 0.00000   | 0.00000       | 0.00000   |
| 4--> 13 | -18.68673 | 0.00000       | 0.00000   |
| 4--> 14 | 0.00000   | 0.00000       | 0.00000   |
| 4--> 15 | 0.00000   | 0.00000       | -0.02769  |
| 4--> 16 | 0.00000   | 1.05262       | 0.00000   |
| 4--> 17 | -25.64554 | 0.00000       | 0.00000   |
| 4--> 18 | 0.00000   | 0.00000       | 0.00000   |
| 4--> 19 | -5.33603  | 0.00000       | 0.00000   |
| 4--> 20 | 0.00000   | 0.00000       | 0.00000   |
| 4--> 21 | -14.99557 | 0.00000       | 0.00000   |
| 4--> 22 | 0.00000   | 0.00000       | 0.00000   |
| 4--> 23 | 0.00000   | -6.00917      | 0.00000   |
| 4--> 24 | 0.00000   | 0.00000       | 0.00000   |
| 4--> 25 | 0.00000   | 0.00000       | -0.03728  |
| 4--> 26 | -0.38139  | 0.00000       | 0.00000   |
| 4--> 27 | 0.00000   | 0.00000       | 0.00000   |
| 4--> 28 | 0.00000   | -5.21634      | 0.00000   |
| 4--> 29 | 0.00000   | 0.00000       | 0.00000   |
| 4--> 30 | -0.93718  | 0.00000       | 0.00000   |
| ---     |           | -- omitted -- | ---       |
| 4--> 83 | 0.00000   | 0.00000       | 0.00000   |
| --      |           |               |           |
| 5--> 6  | 0.00000   | -23.26956     | 0.00000   |
| 5--> 7  | 0.00000   | 0.00000       | 7.62655   |
| 5--> 8  | 0.00000   | -33.36702     | 0.00000   |
| 5--> 9  | 0.00000   | 0.00000       | -58.81056 |
| 5--> 10 | 0.00000   | 12.07783      | 0.00000   |
| 5--> 11 | 0.00000   | 0.00000       | 0.00000   |
| 5--> 12 | 0.00000   | 0.35204       | 0.00000   |
| 5--> 13 | 0.00000   | 0.00000       | -10.27637 |
| 5--> 14 | 0.00000   | 3.07579       | 0.00000   |
| 5--> 15 | -0.01244  | 0.00000       | 0.00000   |
| 5--> 16 | 0.00000   | 0.00000       | 0.00000   |
| 5--> 17 | 0.00000   | 0.00000       | -32.48933 |
| 5--> 18 | 0.00000   | -18.90842     | 0.00000   |
| 5--> 19 | 0.00000   | 0.00000       | -2.14260  |
| 5--> 20 | 0.00000   | -5.97271      | 0.00000   |
| 5--> 21 | 0.00000   | 0.00000       | -18.68527 |
| 5--> 22 | 0.00000   | 0.15550       | 0.00000   |
| 5--> 23 | 0.00000   | 0.00000       | 0.00000   |
| 5--> 24 | 0.00000   | -2.61514      | 0.00000   |
| 5--> 25 | -0.00193  | 0.00000       | 0.00000   |
| 5--> 26 | 0.00000   | 0.00000       | 7.18480   |
| 5--> 27 | 0.00000   | -0.28825      | 0.00000   |
| 5--> 28 | 0.00000   | 0.00000       | 0.00000   |
| 5--> 29 | 0.00000   | 1.04724       | 0.00000   |
| 5--> 30 | 0.00000   | 0.00000       | 2.80524   |
| ---     |           | -- omitted -- | ---       |
| 5--> 83 | 0.00000   | -0.00002      | 0.00000   |
| SUM     | -83.06016 | -37.82046     | -79.27883 |

## Drawing steps:

1. Selecting transitions in the above output terms, of which contributions are larger than a certain value.
2. Drawing the molecular orbitals in the selected transitions using GaussView.
3. Completing the transition maps of interest, using the molecular orbitals drawn above.  
(See Figs. 6–12 in the text.)
